## Assessing salmonellosis risk in raw chicken parts using QMRA

1 **Risk assessment predicts most of the salmonellosis risk in raw chicken parts is**  
2 **concentrated in those few products with high-levels of high-virulent serotypes of**  
3 ***Salmonella***

4 Minh Kim<sup>a</sup>, Cecil Barnett-Neefs<sup>a</sup>, Ruben A. Chavez<sup>a</sup>, Erin Kealey<sup>a</sup>, Martin Wiedmann<sup>b</sup>,  
5 Matthew J. Stasiewicz<sup>a\*</sup>

6 <sup>a</sup> Dept. of Food Science and Human Nutrition, University of Illinois at Urbana-Champaign,  
7 905 S Goodwin Ave., Urbana, IL, 61801, USA

8 <sup>b</sup> Dept. of Food Science, Cornell University, 341 Stocking Hall, Ithaca, NY, 14853, USA

9 \* Corresponding author. 103 Agricultural Bioprocess Lab, 1302 W. Pennsylvania, Urbana,  
10 IL, 1361801. USA. +1-217-265-0963. [mstasie@illinois.edu](mailto:mstasie@illinois.edu).

11 Target Journal: Journal of Food Protection

12

## Assessing salmonellosis risk in raw chicken parts using QMRA

### 13 **Abstract**

14 *Salmonella* prevalence has reduced in U.S. raw poultry products since adopting  
15 prevalence-based *Salmonella* performance standards, but human illnesses did not  
16 reduce proportionally. We used Quantitative Microbial Risk Assessment to evaluate  
17 public health risks of raw chicken parts contaminated with different levels of all *Salmonella*  
18 and specific high- and low-virulent serotypes. Lognormal *Salmonella* level distributions  
19 were fitted using data from 2012 USDA-FSIS Baseline Survey and 2023 USDA-FSIS  
20 HACCP verification sampling data. Three different dose-response (DR) models were  
21 used: Single DR for all serotypes, reduced virulence for Kentucky, multiple serotype-  
22 specific DR models. All scenarios found risk concentrated in the few products with high  
23 *Salmonella* levels. Using a single DR model with Baseline data ( $\mu=-3.19$ ,  $\sigma=1.29$ ), 68%  
24 and 37% of illnesses were attributed to the 0.7% and 0.06% of products > 1 and 10 CFU/g  
25 *Salmonella*, respectively. More recent HACCP data ( $\mu=-4.85$ ,  $\sigma=2.44$ ) showed that 99.9%  
26 and 99.6% of illnesses were attributed to the 2.3% and 0.8% of products > 1 and 10  
27 CFU/g *Salmonella*, respectively. Scenarios with serotype-specific DR models showed  
28 more concentrated risk at higher levels. Baseline data showed 91.5% and 63.7% and  
29 HACCP data showed >99.9% and 99.9% of illnesses were attributed to products > 1 and  
30 10 CFU/g *Salmonella*, respectively. Regarding serotypes, 0.003% and 0.3% of illnesses  
31 were attributed to the 0.2% and 0.7% of products with > 1 CFU/g of Kentucky,  
32 respectively, while 69% and 78.7% of illnesses were attributed to the 0.3% and 1.2% of  
33 products > 1 CFU/g containing either Enteritidis, Infantis, or Typhimurium using Baseline  
34 or HACCP input data, respectively. These results suggest public health risk in chicken  
35 parts is concentrated in the few finished products with high-levels and specifically high-  
36 levels of high-virulent serotypes. Low-virulent serotypes, such as Kentucky, are predicted  
37 to contribute to extremely few human cases.

38       Keywords: risk assessment; *Salmonella*; chicken parts; high-virulent serotypes

39

## Assessing salmonellosis risk in raw chicken parts using QMRA

40 Raw poultry products are an important source of human salmonellosis cases not only in  
41 the U.S. but globally (Barrow et al., 2012). In the U.S., the United States Department of  
42 Agriculture Food Safety and Inspection Service (USDA-FSIS) developed and  
43 implemented the current performance standard based on *Salmonella* prevalence to  
44 reduce the salmonellosis cases attributable to poultry products (USDA-FSIS, 2016).  
45 USDA-FSIS data show *Salmonella* prevalence has decreased over the last several years,  
46 however this reduction in *Salmonella* prevalence has not led to the reduction of human  
47 salmonellosis cases (USDA-FSIS, 2023d; Williams et al., 2022). As outbreak-based  
48 estimations (The Interagency Food Safety Analytics Collaboration, 2023) suggest that  
49 18.6% of foodborne salmonellosis illnesses are attributable to chicken, preventing  
50 salmonellosis from chicken products is expected to help meet the U.S. Healthy People  
51 2030 objective of reducing *Salmonella* infections from 15.3 cases to 11.5 cases per  
52 100,000 population (Office of Disease Prevention and Health Promotion, 2023).

53 Regulation based on *Salmonella* prevalence does not appear to have adequately reduced  
54 human illness cases attributed to poultry, so there is a shift toward considering the risk of  
55 high levels of contamination and different risk presented by contamination by individual  
56 serotypes, to inform potential risk management strategies (NACMCF, 2024). Studies of  
57 the *Salmonella* dose-response (DR) relationship indicated that outbreaks are often  
58 associated with higher doses causing a higher attack rate (Teunis et al., 2010).  
59 Quantitative Microbial Risk Assessment (QMRA) studies investigating *Salmonella* level-  
60 based risk management strategies suggest removing products with high-levels of  
61 *Salmonella* may substantially reduce the public health risk from chicken parts (Lambertini  
62 et al., 2019), ground turkey (Lambertini et al., 2021) and ground beef (Strickland et al.,  
63 2023).

64 *Salmonella* is represented by over 2,600 serotypes that can differ in their capacity to  
65 cause illness (Miller & Wiedmann, 2016). Several studies have suggested different  
66 serotypes have different likelihoods of causing illnesses when consumed in similar doses  
67 (Cheng et al., 2019; Ferrari et al., 2019; Luvsansharav et al., 2019). Outbreak data also  
68 supports that some serotypes are more commonly associated with human illnesses  
69 (Jackson et al., 2013; Jones et al., 2008). The top three most common serotypes  
70 identified in the CDC FoodNet surveillance system are Enteritidis (16% of total),  
71 Typhimurium (14%) and Newport (10%), collectively responsible for 40% of all reported  
72 salmonellosis cases from 1996-2022. Further, genomic analyses show some serotypes  
73 share common determinants of increased virulence (Fenske et al., 2023). In 2023, USDA  
74 defined three serotypes (Enteritidis, Infantis, and Typhimurium) as Key Performance  
75 Indicator (KPI) serotypes for raw poultry products for the 2022-2026 fiscal years (USDA-  
76 FSIS, 2023a). This data suggests that these three serotypes are high-virulent serotypes.  
77 This was based on the incidence of these serotypes in CDC data, their link to outbreaks,  
78 and their frequency in poultry products. In contrast, to these high-virulent serotypes, there  
79 is evidence that Kentucky may represent a low-virulence serotype. *Salmonella* Kentucky  
80 was the most frequently recovered serotype from the carcass surveillance program from

## Assessing salmonellosis risk in raw chicken parts using QMRA

81 USDA-FSIS, but they are less likely to cause human illnesses in the U.S. than other  
82 serotypes (Cosby et al., 2015; Richards, Kue, et al., 2023).

83 Concurrently, USDA-FSIS also proposed a new framework with novel strategies to control  
84 *Salmonella* in poultry products (USDA-FSIS, 2022). One of three major components is to  
85 develop new enforceable final product standards for raw poultry products focusing on  
86 *Salmonella* at certain levels and/or serotypes. In a parallel effort, USDA-FSIS proposed  
87 declaring *Salmonella* above 1 CFU/g as an adulterant in Not Ready To Eat (NRTE)  
88 breaded, stuffed chicken products (USDA-FSIS, 2023e) because NRTE breaded stuffed  
89 chicken products have repeatedly been a source of *Salmonella* outbreaks, 11 outbreaks  
90 from 1998-2022 (CDC, 2023).

91 This study aimed to assess the public health risk of *Salmonella* contamination of chicken  
92 parts with different levels of all serotypes and risk from specific high-virulent and low-  
93 virulent serotypes using public data collected by USDA-FSIS to define level and serotype  
94 inputs. Poultry products are good for exploring the public health impact of food  
95 contaminated with different levels and serotypes of *Salmonella* because of the large  
96 amount of contamination data available. This work advances previous risk assessment  
97 efforts by comparing results from increasingly complex DR approaches, with the most  
98 complex approach using epidemiological and human challenge data to model different  
99 serotype-specific DR relationships for four commonly recovered serotypes in chicken  
100 parts (Teunis, 2022). This work also compares results from using *Salmonella*  
101 enumeration data from a chicken parts baseline study from 2012 that was used in the  
102 previous QMRA effort (Lambertini et al., 2019), to results derived from using recent 2023  
103 USDA-FSIS HACCP verification data for chicken parts (USDA-FSIS, 2023b). This data  
104 was obtained with qPCR, which has a much higher upper limit of quantification making it  
105 possible to better observe and model the high-level tail of the *Salmonella* level  
106 distribution.

## 107 **Material and methods**

### 108 ***Modeling overview***

109 The main steps considered in the QMRA are shown in Figure 1. *Salmonella* in raw chicken  
110 parts was modeled from finished product packaging to consumption. For the *Salmonella*  
111 contamination distribution, two datasets from USDA-FSIS were collected and used (see  
112 Table 1). The QMRA focused on the assessment of the proportion of illnesses coming  
113 from products contaminated with certain levels [ $>LOD$  ( $=1/30$  mL, equivalent to 0.0074  
114 CFU/g),  $>1$  CFU/g,  $>10$  CFU/g] of all *Salmonella* or serotypes of interest including high-  
115 virulent serotypes (Enteritidis, Infantis, and Typhimurium) and a low-virulent serotype  
116 (Kentucky). The dose in one serving was calculated by multiplying values drawn from  
117 *Salmonella* level and serving size distributions. Then, a scaling factor was applied to  
118 reduce *Salmonella* levels to account for the retail and consumer between raw product  
119 packaging and consumption, such as consumer cooking. The scaling factor was set to  
120 match the average probability of illness to a baseline probability of illness, about 2 in a

## Assessing salmonellosis risk in raw chicken parts using QMRA

121 million, calculated using public health data. For the risk characterization, three  
122 approaches with different complexities in DR models were used to assess the public  
123 health risk from different serotypes: (1) One DR model for all serotypes; (2) Reduced  
124 virulence for Kentucky; (3) Multiple serotype-specific DR models. Each approach was  
125 used to assess and compare the public health risk residing in chicken parts contaminated  
126 with different levels of all *Salmonella* and high(Enteritidis, Infantis, Typhimurium) or low-  
127 virulent (Kentucky) serotypes. A relative risk output was defined as an expected  
128 proportion of illnesses caused by products meeting certain contamination conditions  
129 compared to all illnesses predicted from a scenario.

### 130 ***Salmonella* contamination data collection for chicken parts**

131 The project obtained two different datasets including The Nationwide Microbiological  
132 Baseline Data Collection Program: Raw Chicken Parts Survey (hereafter “Baseline parts  
133 survey”) (USDA-FSIS, 2012) and USDA-FSIS routine microbiological sampling of raw  
134 chicken parts (hereafter “HACCP verification data”). Baseline parts survey data was  
135 obtained through a Freedom of Information Act (FOIA) request. HACCP verification data  
136 was obtained from the USDA-FSIS Laboratory Sampling Data webpage (USDA-FSIS,  
137 2023b). A summary of collected data is shown in Table 1.

138 Three types of information were extracted from the datasets: (1) the *Salmonella*  
139 presence/absence screening test result; (2) the enumeration results based on Most  
140 Probable Number (MPN) assay in Baseline parts survey and qPCR assay (GENE-UP™  
141 QUANT *Salmonella*) in HACCP verification data; and (3) *Salmonella* serotypes using  
142 Pulsed-Field Gel Electrophoresis (PFGE) in Baseline parts survey and Whole Genome  
143 Sequencing (WGS) in HACCP verification data. We assumed all sample collection and  
144 assays were conducted as intended, following protocols in Microbial Laboratory  
145 Guidebook (MLG) 4.14. Isolation and Identification of *Salmonella* (USDA-FSIS, 2023c).  
146 For chicken parts sampling, FSIS inspectors prepared rinsate samples by rinsing 1,814  
147 g (4 lb) of chicken using 400 mL of Buffered Peptone Water (BPW) and sent 30 mL of  
148 rinsate sample to the lab. Then, the rinsate sample was enriched and screened through  
149 3M™ Molecular Detection System. The primary screening result was recorded as positive  
150 or negative (LOD = 1 CFU/30 mL, equivalent to 0.0074 CFU/g) (Lambertini et al., 2019).  
151 Only samples scored positive on primary screening were used to determine the  
152 *Salmonella* level and serotypes.

### 153 ***Salmonella* contamination data fitting for level and serotype distributions**

154 This study used a censored data analysis approach based on the limit of detection of the  
155 presence/absence screening assay (LOD = 1 CFU/30 mL) and the quantifiable range of  
156 enumeration methods (MPN: 0.33-11 MPN/mL rinse which translates to 0.007 to 2.4  
157 CFU/g and qPCR: 10-10<sup>7</sup> CFU/mL rinse which translates to 2.2-2.2x10<sup>6</sup> CFU/g using the  
158 volume and weight used for the assay, respectively) to estimate the *Salmonella* level for  
159 chicken parts (USDA-FSIS, 2014). MPN assay result data were fitted to a Lognormal  
160 distribution using a Bayesian latent variable hierarchical model introduced by Williams  
161 and Ebel (2012) and as applied by Lambertini et al. (2021). This method was used to deal



## Assessing salmonellosis risk in raw chicken parts using QMRA

162 with uncertainty in the MPN estimates. To fit the censored data from qPCR enumeration  
163 to a Lognormal distribution, the “fitdistrplus” package was used (Delignette-Muller &  
164 Dutang, 2015). Records with negative screening results were left-censored to lower than  
165 the LOD (1 CFU/30 mL, equivalent to 0.0074 CFU/g). Records with positive screening  
166 results and <10 CFU/mL were Interval censored between LOD (1 CFU/30 mL, equivalent  
167 to 0.0074 CFU/g) and 10 CFU/mL. Observations within the qPCR quantification range  
168 (10-10,000,000 CFU/mL) were not censored. No record was right censored, as no result  
169 above 10,000,000 CFU/mL was observed.

170 A summary of all fits is provided in Table 2, with the observed counts from each dataset  
171 and expected proportion from fitted distribution within *Salmonella* levels of interest [ $>$  LOD  
172 (1 CFU/30 mL, equivalent to 0.0074 CFU/g),  $>$ 1 CFU/g,  $>$ 10 CFU/g]. The *Salmonella* level  
173 distribution fit model code is provided in GitHub, and was coded in R (R Core Team,  
174 2023), Just Another Gibbs Sampler (JAGS) (Plummer, 2022), using the R package “rjags”  
175 package (Plummer et al., 2023). Additionally, the packages “readxl” (Wickham & Bryan,  
176 2023), “stringr” (Wickham, 2022), “pastecs” (Grosjean & Ibanez, 2018), “knitr” (Xie, 2023),  
177 and “MASS” (Ripley & Venables, 2023) were also used in overall data management.

178 Serotype distributions from the Baseline parts survey from 2012 and two different time  
179 periods HACCP verification data (03/26/2015- 07/01/2022 and 10/03/2022-06/30/2023)  
180 are shown in Table 3. For the QMRA serotype distribution input, HACCP verification data  
181 from 2015 to 2022 was used to have more data points with a similar number of samples  
182 each year over a long recent period of time. Baseline parts survey serotype distribution  
183 was not used to avoid over-sampling from one specific year. The recently released  
184 serotype data from 10/03/2022-06/30/2023 was not used in this study because this data  
185 became available after we started using the 2015-2022 serotype distribution for the  
186 QMRA. One serotype for every serving was randomly selected from this serotype  
187 distribution to represent the serotype in one serving.

188 In summary, we used the Baseline parts survey and HACCP verification data to represent  
189 the different *Salmonella* level distributions, which we modeled separately to check for the  
190 impact of uncertainty in the level distribution. Conversely, we used a single serotype  
191 distribution from HACCP verification data spanning the time between both datasets used  
192 for levels as this provided a larger and more robust set of data for the serotype distribution.

### 193 **Candidate Final Product Standards**

194 The model was designed to first check if the level is above a certain level threshold. Then  
195 it checks if the serotype in the serving is a serotype of interest or not. *Salmonella* levels  
196 of interest were set at LOD, 1 CFU/g and 10 CFU/g. LOD was set as a level of interest  
197 based on current prevalence-based *Salmonella* performance standards. 1 CFU/g was  
198 selected as a representative level for being the threshold for NRTE breaded chicken  
199 products. 10 CFU/g was set to test a higher level than 1 CFU/g.

200 High-virulent and low-virulent serotypes were selected based on the scientific evidence  
201 showing the relationship between human illnesses and serotypes. Table 3 lists serotypes

## Assessing salmonellosis risk in raw chicken parts using QMRA

202 that were considered for serotype-specific DR models in this study and the reason for  
203 that. High-virulent serotypes considered in this study were Enteritidis, Infantis, and  
204 Typhimurium because they are often related to human illnesses and USDA-FSIS also  
205 considered these three serotypes as KPIs for raw chicken products. As our risk  
206 assessment was specific for the U.S., Kentucky was considered a low-virulent serotype  
207 as it rarely causes human illness in the U.S. (few reported cases) but is one of the  
208 serotypes most commonly recovered from chicken products in the U.S. Thus, a scenario  
209 of excluding Kentucky was evaluated.

210 Candidate final product standards investigated for the public health risk were (1) “level  
211 only” assuming *Salmonella* above a certain level is targeted (2) “level&high-virulent (KPI)  
212 serotypes” focusing on high-levels of high-virulent *Salmonella*, (3) “level&exclude low-  
213 virulent serotype Kentucky” focusing on the high-levels of all *Salmonella* but Kentucky to  
214 see how letting Kentucky pass through the system affects the overall risk.

### 215 ***Simulating Salmonella dose in one serving using a scaling factor to adjust for retail*** 216 ***to consumer handling practices***

217 The total dose of *Salmonella* per serving was calculated by multiplying observations from  
218 the *Salmonella* level distribution and the serving size distribution. For the *Salmonella* level  
219 distribution, Lognormal distribution parameters [Baseline parts survey: ( $\mu=-3.19$ ,  $\sigma=1.29$ ),  
220 HACCP verification data: ( $\mu=-4.85$ ,  $\sigma=2.44$ )] were used. A previously published serving  
221 size distribution (Lambertini et al., 2019), with a mean of 2.06 Log g and a standard  
222 deviation of 0.23 Log g, was used; these data came from the NHANES data for chicken  
223 breast consumption (CDC, 2018).

224 A scaling factor representing multiple Log reductions was used to adjust for the fact that  
225 the input *Salmonella* distribution is raw chicken parts, but obviously people rarely  
226 consume chicken raw. Therefore, the scaling factor provides an aggregate Log reduction  
227 from finished product packaging to consumption that represents the overall effect of retail,  
228 consumer handling, and cooking practices. The value of this scaling factor was set to  
229 match the baseline mean probability of illness model output to the order of magnitude of  
230 the incidence of salmonellosis associated with chicken consumption in the U.S. The  
231 nationwide consumption of chicken was estimated based on 30.9 kg (61.8 lb) of chicken  
232 per capita consumption (USDA-FSIS, 2023). The serving size was estimated to be 114 g  
233 (as per above,  $10^{2.06}$  log g per serving) equating to around 271 servings of chicken per  
234 person in a year. When considering the U.S. population of about 332 million people on  
235 July 1<sup>st</sup> 2021 (United States Census Bureau, 2023), it can then be calculated that the total  
236 chicken servings per year in the U.S. is around 90 billion servings which was calculated  
237 by multiplying the U.S. population by the number of servings per person. The number of  
238 foodborne illness attributable to chicken was calculated by multiplying a mean estimated  
239 number of 1,027,561 domestically acquired salmonellosis cases in a year from Scallan et  
240 al. (2011) by 17.3% of foodborne disease attributed to *Salmonella* in chicken from 2020  
241 data reported in 2022 (most current number at the time of our calculation) (The  
242 Interagency Food Safety Analytics Collaboration, 2022) leading to 177,768 salmonellosis

## Assessing salmonellosis risk in raw chicken parts using QMRA

243 cases attributed to chicken. Using the values calculated above, the probability of illness  
244 in one serving can be obtained by dividing the amount of foodborne illness attributed to  
245 *Salmonella* in a year (177,768 cases) by the total number of chicken servings  
246 (89,969,366,913 servings) consumed. The resulting calculation produces an estimate of  
247 about 2 salmonellosis cases per 1 million servings of chicken consumed. The scaling  
248 factor for each model was calculated to match the average probability of illness to this  
249 baseline by running the model with 10 of 100,000 iterations with Monte Carlo simulation.  
250 When the mean of 10 simulations matches the baseline probability of illness (about 2 in  
251 a million), the scaling factor was saved for use in the QMRA.

### 252 **Risk characterization**

253 For the risk characterization, three different DR model approaches with different  
254 complexities were used to assess the public health risk from different serotypes: (1)  
255 WHO/FAO (2002) DR model parameters using for all serotypes; (2) Serotype Anatum DR  
256 model parameters representing low virulent serotype Kentucky and WHO/FAO (2002)  
257 model parameters assigned for non-Kentucky serotypes; (3) Teunis (2022) four serotype-  
258 specific DR model parameters assigned to 7 serotypes and randomly assigning 1 of 4 DR  
259 model parameters to other serotypes. Table 4 summarizes which DR model parameter is  
260 assigned to which serotype and the reasoning for assigning. The average probability of  
261 illness in a serving is characterized by simulating 1 million servings.

262 The probability of illness per serving was estimated using two DR models.

263 The first one is the Beta-Poisson DR equation (eq 1), where *S.F.* is the scaling factor, and  
264  $\alpha$  and  $\beta$  values are parameters of the distribution for calculating the probability of illness  
265 ( $P_{ill}$ ). Beta-Poisson model was used for all serotypes of *Salmonella* (WHO/FAO, 2002)  
266 and *Salmonella* Anatum from QMRA wiki ([https://qmrawiki.org/experiments/salmonella-  
267 anatum](https://qmrawiki.org/experiments/salmonella-anatum)). For Beta-Poisson DR model, Probability of illness is characterized as

$$268 \quad P_{ill} = 1 - \left(1 + \frac{S.F. \times dose}{\beta}\right)^{-\alpha} \quad (1)$$

269 The second model is a hierarchical Beta-Poisson DR model (eq 2) for serotype-specific  
270 DR model parameters extracted from Teunis (2022). Among 14 serotype-specific DR  
271 model parameters provided, only four serotype-specific DR model parameters  
272 (Enteritidis, Heidelberg, Typhimurium and Anatum) were used here to simulate the  
273 serotype-specific probability of illness as they represented serotypes of interest and  
274 showed appropriate sample size in outbreak data ( $n \geq 100$  data points), and reliable  
275 human challenge studies.

276 Teunis (2022) serotype-specific DR models follow these two hierarchical DR functions.  
277 The probability of illness for a given dose ( $P_{ill|dose}$ ) is conditional ( $P_{ill|inf}$ ) on infection from a  
278 given dose ( $P_{inf|dose}$ ), as

$$279 \quad P(ill|dose) = P(ill|inf) \times P(inf|dose) \quad (2)$$



## Assessing salmonellosis risk in raw chicken parts using QMRA

280 Where the probability of infection ( $P_{inf}$ ) is defined by the hypergeometric Beta-Poisson  
281 model (Teunis & Havelaar, 2000) using serotype-specific Teunis (2022) microbial  
282 infection parameters

$$283 \quad P_{inf} = 1 - {}_1F_1(\alpha, \alpha + \beta, -S.F.X \text{ dose}) \quad (3)$$

284 Then the probability of illness given infection uses a hazard model of illness

$$285 \quad P_{ill|inf} = 1 - \left(1 + \frac{S.F. \times \text{dose}}{\eta}\right)^{-r} \quad (4)$$

286 For equations 3 and 4, four parameters  $\alpha$ ,  $\beta$ ,  $\eta$ ,  $r$  are extracted from Teunis (2022) and  
287 provided in Table S1.

288 For the risk assessment, relative risk is defined as the proportion of illnesses expected  
289 from products with certain types of contamination. The proportion of finished products  
290 meeting the described contamination was also obtained from the 1 million iterations of  
291 the Monte Carlo simulation. The number of servings from products with certain levels of  
292 all *Salmonella* or serotypes of interest was calculated by multiplying the proportion by  
293 about 90 billion estimated total number of chicken servings in a year. The mean probability  
294 of illness from the products with certain levels of all *Salmonella* or serotypes of interest  
295 was then multiplied by the number of servings that are coming from the products with the  
296 contamination described. This estimated number of illnesses was then divided by the total  
297 number of illnesses expected in a year from all servings consumed. The relative risk was  
298 compared between three different QMRA approaches and two different *Salmonella* level  
299 distributions.

$$300 \quad \text{Relative risk (\%)} = \frac{\text{Estimated number of illnesses per year from servings with certain contamination}}{\text{Baseline estimated number of illnesses per year from all servings}} * 100 \quad (5)$$

### 302 **Data and Model availability**

303 The QMRA for this study was developed in both R and @risk. R code used for this study  
304 was developed in R version 4.1.1. (R Core Team, 2021). All QMRA models and datasets  
305 used in this study are accessible at [https://github.com/foodsafetylab/Kim-2024-  
306 PoultrySalmonellaModels](https://github.com/foodsafetylab/Kim-2024-PoultrySalmonellaModels).

307

## Assessing salmonellosis risk in raw chicken parts using QMRA

### 308 **Results**

#### 309 **Publicly available finished product chicken parts datasets show rare contamination** 310 **with *Salmonella* above 1 CFU/g.**

311 Enumeration data from two different USDA-FSIS finished chicken parts datasets were  
312 used to compare *Salmonella* contamination at different levels (Table 2). The Baseline  
313 parts survey data from 2012 shows 722 of 2,296 (28.9%) samples tested positive using  
314 a rinse of 4 lb of parts in 400 ml of buffer, enriching and quantifying a 30 ml portion (for  
315 LOD of 1 CFU / 30 ml in rinsate, so 0.0074 CFU/g in parts). Focusing on the high-level  
316 tail, only 38 (1.52%) samples tested above 1 CFU/g, and the observed MPN results had  
317 an upper limit of 11 MPN/mL rinse, which was 2.4 CFU/g parts (so it was not possible to  
318 directly observe if samples were above 10 CFU/g). A distribution fitting process  
319 accounting for the lower detection and upper quantification limits (left and right censored  
320 data) gave a lognormal distribution with a mean of -3.19 Log(CFU/g) and a standard  
321 deviation of 1.29 Log(CFU/g). This distribution implies a 20.6% *Salmonella* prevalence  
322 (% >LOD of 0.0074 CFU/g, lower than observed), with 0.7% of samples above 1 CFU/g  
323 (close to observed), and 0.06% of the samples above 10 CFU/g.

324 The more recent HACCP verification data collected from Jan. to jun. 2023 shows that 539  
325 of 6,200 (8.7%) chicken part samples tested positive. This more recent data used qPCR  
326 for quantification, not MPN as in the Baseline parts survey, which was more sensitive to  
327 the higher-level tail. For HACCP verification data, 56 (0.9%) samples tested above 2.2  
328 CFU/g (the lower limit of quantification, lower LOQ, binned in Table 2 as > 1 CFU/g) and  
329 25 (0.4%) tested above 10 CFU/g. These data also included 461 positive samples that  
330 tested less than the lower LOQ (binned as positive in Table 2). These samples are  
331 analyzed as interval-censored (> LOD of 0.0074 CFU/g and < lower LOQ of 2.2 CFU/g  
332 parts from the assay lower LOQ of < 10 CFU/ml rinse). A distribution process accounting  
333 for the lower detection and quantification limits (left and interval censored data) gave a  
334 Lognormal distribution with a mean of -4.85 Log(CFU/g) and a standard deviation of 2.44  
335 Log(CFU/g). This distribution implies a 13.2% *Salmonella* prevalence (above observed),  
336 with 2.3% of samples above 1 CFU/g (close to observed), and 0.8% above 10 CFU/g  
337 (close to observed).

338 Across datasets, both observed counts and fitted Lognormal distribution showed that a  
339 small proportion of products had contamination above 1 CFU/g. Comparing the two  
340 datasets, the more recent HACCP verification data was estimated to have about 1 Log  
341 lower mean level distribution, but about 1 Log greater variability. These parameter  
342 estimates are consistent with the observation that the more recent HACCP verification  
343 data shows lower *Salmonella* prevalence but very likely more samples above the 1 CFU/g  
344 and 10 CFU/g high-level thresholds (differences in quantifiable range prevent direct  
345 comparison of observed frequencies at specific high-level thresholds).

346 **This QMRA estimates chicken parts with finished product contamination above 1**  
347 **CFU/g *Salmonella* account for most of the risk, when modelling contamination data**

## Assessing salmonellosis risk in raw chicken parts using QMRA

348 **from the 2012 Baseline parts survey and a classic WHO/FAO dose response**  
349 **approach treating all *Salmonella* serotypes equally.**

350 Table 5 shows the proportion of total salmonellosis risk from chicken parts for those parts  
351 that match a given finished product contamination profile (the 'relative risk') across many  
352 different contamination profiles that could represent candidate finished product standards  
353 (rows in the table) and assumptions regarding input contamination data and DR model  
354 approaches (columns). Each result was collected with 1 million Monte Carlo iterations in  
355 R, where the mean risk of illness for the product with a given contamination profile was  
356 compared to the risk for all products (under those assumptions for contamination  
357 distribution and DR model approach), such that the baseline risk from products with all  
358 levels and all serotypes is always 100%.

359 The most appropriate starting point to present results is those assuming contamination  
360 from the Baseline parts survey and using the WHO/FAO(2002) DR model approach that  
361 treats all serotypes equally (4<sup>th</sup> and 5<sup>th</sup> columns), as these assumptions are most  
362 consistent with previous risk assessments. For these assumptions, 98.4% of illnesses  
363 were attributed to the 20.7% of finished chicken parts that have *Salmonella* levels above  
364 the typical assay LOD of 0.0074 CFU/g. Further, 68.1% of illnesses were attributed to the  
365 0.7% of finished products above 1 CFU/g and 37.4% of illnesses were attributed to the  
366 0.06% of finished products above 10 CFU/g. Therefore, under these assumptions, most  
367 of the illnesses from chicken parts are predicted to be from finished products  
368 contaminated with more than 1 CFU/g.

369 **When accounting for serotype-specific dose-response models, the estimated**  
370 **relative risk of salmonellosis caused by finished products above 1 CFU/g increases**  
371 **to almost all the total risk.**

372 The next two DR model approaches model increasingly complex treatment of serotype-  
373 specific risk, first reducing the virulence of Kentucky (Table 5, 6<sup>th</sup> column), then using 4  
374 different serotype-specific DR parameters sets to represent the range of *Salmonella*  
375 serotypes (Table 5, 7<sup>th</sup> column). Simply reducing Kentucky virulence has almost no  
376 impact on the relative risk of products contaminated with high-levels of any *Salmonella*.  
377 Accounting more fully for serotype-specific virulence noticeably increases the relative risk  
378 associated with high-level contamination, from 68.1% to 91.5% for products above 1  
379 CFU/g and from 37.4% to 63.7% for products above 10 CFU/g, still using the Baseline  
380 parts survey contamination. The QMRA also predicts a small increase in illness risk  
381 associated with the 20.7% of products with detectable contamination, from 98.4% to  
382 99.8%.

383 Having a serotype-specific DR model makes it possible to examine the relative risk  
384 presented by various serotypes and levels of contamination. The bar plots at top of Figure  
385 2 visualize these relative risks for products above the level threshold on the right side of  
386 dashed line, breaking these apart by serotype groups of interest, and also products below  
387 the level threshold on the left side. The density plots below the bar plots visualize the  
388 proportion of finished products that are above or below the level thresholds for both input

## Assessing salmonellosis risk in raw chicken parts using QMRA

389 contamination datasets. The results that assume the Baseline parts survey  
390 contamination, show that the single grouping with the most illness attributed (75.3%) is  
391 the three KPI serotypes (Enteritidis, Infantis, and Typhimurium) above the given level  
392 thresholds. *Salmonella* Kentucky is predicted to be responsible for relatively few illnesses,  
393 even when above the relatively high-level thresholds.

394 **When assuming contamination consistent with more recent chicken parts HACCP**  
395 **verification data, the higher though still rare fraction of products with very high-**  
396 **level contamination (0.8% above 10 CFU/g) is estimated to contain virtually all of**  
397 **the public health risk.**

398 The more recent HACCP verification data shows a lower prevalence, but larger tail of  
399 high-level contamination, which is modeled as a contamination input distribution with a  
400 lower mean but higher deviation (Table 5, last 4 columns, and Figure 2). Using these  
401 data, virtually all the risk (99.61%) is attributable to the 0.8% of products above 10 CFU/g,  
402 using the WHO/FAO DR model approach treating all serotypes equally. Risk is even more  
403 concentrated (99.99% or more) in products above 10 CFU/g using the serotype-specific  
404 DR model approach. Products with detectable *Salmonella* level now represent more than  
405 99.998% of risk across all DR model approaches. Further, 78.7% of total risk is  
406 attributable to the 0.4% of products with three KPI serotypes when present above the 10  
407 CFU/g level thresholds (Figure 2).

408 **Final product standards that target relatively high-levels of high-virulent serotypes**  
409 **would target finished products responsible for a large fraction of public health risk**  
410 **while implicating a smaller fraction of finished products.**

411 Figure 2 shows that most of the public health risk is in the relatively small fraction of  
412 finished products contaminated above 1 CFU/g or 10 CFU/g, and particularly those  
413 contaminated with high-virulent serotypes including Enteritidis, Infantis, and Typhimurium  
414 across both finished product contamination datasets. Therefore, we modeled the relative  
415 risk of products that would be implicated by candidate finished products standards that  
416 apply not just to levels (e.g., > 10 CFU/g) but also what serotypes the standards would  
417 apply to (e.g., current KPI serotypes).

418 One analysis was a finished product standard that applies to only selected high-virulent  
419 serotypes (specifically Enteritidis, Infantis, and Typhimurium as the current USDA-FSIS  
420 KPI serotypes as of late 2023, middle rows of Table 5). Modelling the contamination from  
421 the Baseline parts survey, and using the full serotype-specific DR approach, 75.3%,  
422 69.0%, and 47.8% of relative risk was attributed to products contaminated with  
423 detectable, >1, and >10 CFU/g respectively. The more interesting thing is the comparison  
424 between these results and the level-only standard. While 99.9% of relative risk is present  
425 in the 20.7% of products with detectable *Salmonella*, 75.3% of the total risk is present in  
426 the only 10.6% of products with detectable current KPI serotypes, suggesting most of the  
427 risk is in about half of the detectably contaminated products. Similarly, while 91.5% of the  
428 risk is in 0.6% of products with contamination >1 CFU/g of all serotypes, 69.0% of the risk  
429 is in the 0.3% of products with KPI serotypes >1 CFU/g. Furthermore, 63.7% of the risk

## Assessing salmonellosis risk in raw chicken parts using QMRA

430 is in the 0.06% contaminated by all serotypes >10 CFU/g and 47.8% of the risk is in the  
431 0.03% contaminated by KPI serotypes >10 CFU/g. In all cases, standards that target only  
432 KPI serotypes would implicate about half the product and retain more than half the public  
433 health benefit, suggesting a path to effective illness reduction that meets the 25% Healthy  
434 People 2023 target.

435 When modelling the newer HACCP verification data, the overall trend is still present that  
436 risk can be more efficiently reduced by targeting specific serotypes, although the specifics  
437 differ. In these results, level-only standards would remove almost all the public health risk  
438 (99.99+%), but targeting only the current KPI serotypes would remove about 78.7% of  
439 relative risk while still implicating only about half the overall product. It is also worth noting  
440 that the same standards apply much less effectively when assuming the WHO/FAO(2002)  
441 DR approach treating all serotypes equally, which is a logical consequence of the DR  
442 model and further justification for work to use serotype-specific DR models for risk  
443 assessment.

444 As a logical converse to the above analyses targeting high-virulent serotypes, we also  
445 modeled standards that permit the presence of a low virulent serotype (specifically  
446 allowing Kentucky at any contamination level, bottom rows of Table 5). Applying this  
447 finished product standards approach to the contamination representing the Baseline parts  
448 survey, the relative risk was 99.9%, 91.5%, and 63.7%, for contamination detectable, >1,  
449 or > 10 CFU/g, respectively. Critically, these numbers are essentially the same as for the  
450 only level-based standards and do implicate about 30% less product; the same trend  
451 appears in the results for the DR approach that explicitly reduces Kentucky virulence from  
452 the single WHO/FAO DR base approach. For the contamination profile representing the  
453 newer 2023 HACCP verification data, these standards implicate products responsible for  
454 99.7% of relative risk, compared to 99.99% or more for only level-based standards.  
455 Overall, these analyses suggest the finished products contaminated with serotype  
456 Kentucky present a very low public health risk.

## 457 Discussion

458 **Because multiple risk assessments show the most risk is from high-levels of**  
459 **contamination, it is important to accurately measure and model the high-level tail**  
460 **of the contamination distribution.**

461 This and another recent chicken parts QMRA (Lambertini et al., 2019) show that the risk  
462 is concentrated in products with the high-levels of *Salmonella* (products >1 MPN/g and  
463 >10 MPN/g), as do studies in ground turkey (Lambertini et al., 2021; Sampedro et al.,  
464 2024) and ground beef (Strickland et al., 2023). But all these studies model product  
465 contamination data collected using MPN method for the enumeration (in our case the  
466 Baseline parts survey data), which unfortunately has an upper limit of quantification lower  
467 than levels responsible for much of the risk (assay limit of 11 MPN/ml, here parts rinse,  
468 which translates to 2.4 CFU/g parts). So, it is not possible to directly observe, e.g.,  
469 contamination at or above 10 CFU/g.



## Assessing salmonellosis risk in raw chicken parts using QMRA

470 The current best practice for building a risk assessment accounting for the unobserved  
471 higher-level tail of contamination has been to fit an underlying statistical distribution to  
472 these 'censored' data such that the fitted distribution gives results that would reasonably  
473 reproduce the observed pattern of both quantifiable and outside the quantification limit  
474 data. Our work uses a Bayesian latent variable hierarchical model suggested by Williams  
475 and Ebel (2012) specifically for MPN data, and was previously applied in the risk  
476 assessments by Lambertini et al. (2019, 2021). This method reasonably assumes the  
477 observed data comes from an underlying Lognormal distribution, which is commonly used  
478 for modelling chicken product contamination distributions (Jongenburger et al., 2015).  
479 The method also gives more precise and less biased parameter estimates than Maximum  
480 Likelihood Estimation (Williams & Ebel, 2012). Our analysis fitting the censored data  
481 predicts approximately 0.06% of chicken parts represented in the Baseline parts survey  
482 data would have contamination > 10 CFU/g, but one would have much greater confidence  
483 in this estimate of the tail of the distribution if one could directly observe contamination at  
484 that level.

485 One major advance in our work is that this is the first chicken risk assessment (to our  
486 knowledge) that uses public *Salmonella* data for chicken parts contamination that directly  
487 measures contamination in the high-level tail. Specifically, our study evaluates 2023  
488 HACCP verification data which uses qPCR for enumeration, a method with higher and  
489 wider quantification range than MPN (qPCR: 10 to 10<sup>7</sup> CFU/mL rinse compared to MPN:  
490 0.33 to 11 MPN/mL rinse, which translates to qPCR 2.2 to 2.2x10<sup>6</sup> CFU/g parts compared  
491 to MPN 0.007 to 2.4 CFU/g parts). The modest tradeoff between these methods is that  
492 when using qPCR in combination with the limit of quantification (2.2 to 2.2x10<sup>6</sup> CFU/g  
493 parts) is wider than for MPN (0.007 to 2.4 CFU/g parts). An even more sensitive method,  
494 such as MPN-qPCR-Shortened Incubation Time (SIT) introduced by Kim et al. (2017),  
495 could possibly resolve the tradeoff between quantifying the highest levels and those just  
496 above those detected by enrichment. Still, censored data analysis can accommodate any  
497 range of 'interval censored' data. The input 2023 HACCP verification data had 0.4% of  
498 samples >10 CFU/g, and the fitted distribution had 0.8% of contamination >10 CFU/g,  
499 which is a reasonable fit to the now observable highest risk tail, while still reproducing the  
500 prevalence in the data reasonably (observed 8.7% positive, fitted 13.2% above the  
501 detection threshold). In contrast, the older 2012 Baseline parts survey data showed a  
502 higher overall prevalence (observed 28.9%, fitted 20.6%), with a small tail of high-level  
503 contamination (1.5% observed > 1 CFU/g, fitted as 0.6%, with no ability to observe > 10  
504 CFU/g, fitted as 0.06%). It seems to be a valuable advance in data to support risk  
505 assessment to directly measure the highest levels, and to give direct support to the  
506 distribution fitting processes to model those levels, given that risk becomes increasingly  
507 concentrated at higher levels of contamination. Such effort to more accurately model high-  
508 level tails is very important in this case, where the more recent data suggests a decrease  
509 in overall prevalence, but indicates a possible increase in the high-level contamination  
510 tail.

## Assessing salmonellosis risk in raw chicken parts using QMRA

511 **High-virulent serotypes are commonly found in finished product samples, so it is**  
512 **important to accurately assess risk using serotype-specific dose-response**  
513 **models.**

514 There is substantial evidence that the >2,600 *Salmonella* serotypes can differ in virulence  
515 and public health risk (Fierer & Guiney, 2001; Grimont & Weill, 2007; Jones et al., 2008)  
516 with clear genomic and epidemiologic data that isolates representing some serotypes and  
517 clades show a substantially lower or higher risk of causing human illness (Fenske et al.,  
518 2023; Teunis, 2022). However, no previously published poultry QMRA adequately  
519 modeled risk comparing factors including prevalence and level with a comprehensive  
520 treatment of serotype-specific DR model (NACMCF, 2024).

521 Our study used three different DR approaches to illustrate the implications and  
522 importance of serotype-specific DR models. In our simplest approach, treating all  
523 serotypes as equally virulent (with contamination consistent with the Baseline parts  
524 survey data), about half of the risk in products with high-levels (>10 CFU/g, which  
525 represents about 37% of the total risk) was from those with high-levels of high-virulent  
526 serotypes (19% of the 37% total) because three high-virulent serotypes account for about  
527 half of serotype prevalence in chicken parts as you can see in 4<sup>th</sup> column of Table 3. In  
528 the slightly more complex approach where we explicitly lowered the virulence of  
529 Kentucky, about two-thirds of the risk from high-level products was from high-virulent  
530 serotypes (26% of the 37% total). Two other risk assessments used a conceptually similar  
531 approach, assigning reduced virulence DR parameters to low-virulent serotypes though  
532 not just Kentucky, and reported a similar result that most illnesses were attributed to high-  
533 virulent serotypes in turkey (Sampedro et al., 2024) and beef (Strickland et al., 2023)  
534 products.

535 This study is the first risk assessment for chicken combining impacts of high-level  
536 contamination with a more complete serotype-specific DR approach. Specifically, the four  
537 most commonly recovered serotypes from chickens (Kentucky, Enteritidis, Infantis and  
538 Typhimurium), as well as a few others where data were available, were assigned the DR  
539 model parameters from Teunis (2022), which used epidemiological outbreak data (for  
540 high-virulent serotypes) and human feeding trials data (for low-virulent serotypes). We  
541 also adopted the source work's approach to separately model the probability of infection  
542 and illness if infected, and the correlation between parameters. Using this more complete  
543 serotype-specific DR approach (and assuming *Salmonella* input level from the Baseline  
544 parts survey data), indicates that about two-thirds (67%) of the total risk was in products  
545 with high-levels (>10 CFU/g), and still about two-thirds of that risk was attributable to the  
546 current KPI serotypes >10 CFU/g (48% of the 67% total), with virtually no risk coming  
547 from Kentucky. This trend is even more extreme in the scenario assuming the 2023  
548 HACCP verification data *Salmonella* input level distribution, with a larger high-level tail,  
549 where virtually all the risk is in the high-level tails, and 79% of the total risk is attributed to  
550 KPI serotypes. In this case, still almost no risk (0.3%) is attributable to Kentucky, even  
551 though this serotype represents about 30% of the contamination at all level thresholds.

## Assessing salmonellosis risk in raw chicken parts using QMRA

552 One limitation in this serotype-specific risk assessment approach is that we assumed only  
553 one serotype exists in any given product. We took this approach as the current HACCP  
554 verification data only reports a single serotype for a sample, due to methodological  
555 limitations. A new method suggested by Thompson et al. (2018) can identify multiple  
556 serotypes from one sample using sequencing of CRISPR spacers present in the sample;  
557 a recent study using this method found that only 3 out of 38 post-chill carcass samples  
558 contained multiple serotypes (Richards, Siceloff, et al., 2023). In addition, the same study  
559 found that Kentucky and the three KPI serotypes (Enteritidis, Infantis and Typhimurium)  
560 were still the most frequently identified serotypes, suggesting the assumption of a single  
561 serotype for contamination will not bias these serotype-specific model results in any  
562 obvious direction.

563 **These results suggest one could efficiently manage food safety risk using**  
564 **strategies that target the small fraction of the highest risk products.**

565 As previously discussed, our QMRA (and others) showed concentrated risk in the small  
566 fraction of products contaminated with high-levels of *Salmonella*, and even more  
567 concentrated risk in products with high-levels of high-virulent serotypes. These risk  
568 assessment results imply that it would be both effective and efficient to develop and  
569 implement practical risk management strategies focusing on reducing the small fraction  
570 of high-level *Salmonella* contamination, and/or specifically high-virulent serotypes.

571 There are different ways to interpret this risk assessment result. First, if one assumes  
572 perfect sampling and testing could identify and eliminate every product with contamination  
573 above a given threshold, our results assess the risk reduction expected from eliminating  
574 that contamination from the food supply. Obviously, perfect sampling and testing are  
575 neither realistic nor practical, but these results could then inform a plausible maximum  
576 effect of a test and reject strategy. Other risk assessments have extensively modeled the  
577 impacts of different within lot variability (Lambertini et al., 2019; Lambertini et al., 2021),  
578 and different sampling and testing plan assumptions (Sampedro et al., 2024), which can  
579 be seen as a way to put these 'perfect test' results into context.

580 Another way to interpret this risk assessment results is to use improved process controls  
581 (Cohn et al., 2023) to dramatically reduce the likelihood of a high-level and/or high-virulent  
582 serotype product, which could then provide a meaningful level of risk reduction. One  
583 process control strategy could be adopting control limits for total *Salmonella* levels, such  
584 as setting an internal upper control limit to something observable and actionable (e.g., >1  
585 CFU/g), and setting an upper specification limit to something indicative of a true public  
586 health failure (e.g., >10 CFU/g). Such a process control approach would allow for routine  
587 monitoring and process improvement through corrective action, without relying on a lot-  
588 specific microbial criterion to identify failed lots. The proposed USDA-FSIS *Salmonella*  
589 framework does mention the consideration of applying Statistical Process Control (SPC)  
590 to indicator organism testing throughout the sanitary dress process (USDA-FSIS, 2022).  
591 In addition, a paper has explored SPC for various quality indicators in processing facilities  
592 in the European Union (Mataragas et al., 2012) and a few recent papers have explored

## Assessing salmonellosis risk in raw chicken parts using QMRA

593 statistical relationships between indicator organisms and *Salmonella* at different  
594 processing stages. (Chavez-Velado et al., 2024; Williams et al., 2015; Williams et al.,  
595 2017), but none directly apply SPC to pathogens directly.

596 Another process control strategy can be serotype-specific control strategies. One  
597 commonly used example is the vaccination of live birds in poultry houses against one or  
598 a few high-virulent serotypes, e.g., Typhimurium (Dórea et al., 2010; NACMCF, 2024;  
599 Hofacre et al., 2021). The U.S. has seen a substantial decrease in infections caused by  
600 Typhimurium and Heidelberg last 20 years and this seems to match with the timing when  
601 commercial poultry vaccines against Typhimurium became available (NACMCF, 2024).  
602 Another example could be preharvest lotting strategies, where one would test incoming  
603 flocks for high-virulent serotypes and apply additional risk reduction measures to those  
604 flocks. This may include removal of high-virulent flocks from certain secondary  
605 processing, such as grinding, to reduce the risk profile of finished products from those  
606 processes. Alternatively, 'logistical slaughter' could be used where high-virulent flocks are  
607 processed at the end of a shift to prevent cross contamination to lower risk and is already  
608 implemented in many countries in EU (Rasschaert et al., 2020). However, the  
609 effectiveness of this approach is unclear yet as the correlation between the preharvest  
610 and finished product is shown to be weak (Nauta et al., 2009; Rasschaert et al., 2008).  
611 More specifically, there is a shift in the recovered serotype distribution between breeder  
612 flocks, chilled carcasses, and finished intact parts (Siceloff et al., 2022), complicating the  
613 relationship between preharvest interventions and finished product outcomes. In addition,  
614 vaccination targeting specific serotypes can create a niche and this niche can be filled by  
615 other serotypes, possibly other high-virulent serotypes (Foley et al., 2011).

616 **A strategy to target risk concentrated in contamination with high-levels or high-**  
617 **virulent serotypes can be applied to other chicken products and other meat and**  
618 **poultry.**

619 This study used the chicken parts category as a representative product because it is a  
620 widely consumed product with extensive contamination data available. Our results are  
621 consistent with a previous study (Lambertini et al., 2019), which also showed that finished  
622 products with high-level contamination have more risk, a concept relevant to other poultry  
623 and other meat products. Lambertini et al. (2021) modeled ground turkey and suggested  
624 a similar result, that a microbial criterion of 1 cell/g for finished products would lead to an  
625 estimated 46.1% reduction in risk of illness. Another QMRA using ground turkey data  
626 showed removing ground turkey lots contaminated with above 10 MPN/g and 1 MPN/g  
627 will reduce illness about 38.2% and 73.1%, respectively (Sampedro et al., 2024). A QMRA  
628 for ground beef showed a small fraction of high-level products contaminated with above  
629 10 MPN/g and 1 MPN/g contain about 13.6% and 36.7% of risks, respectively (Strickland  
630 et al., 2023). Overall, our data and previous studies across products thus support that  
631 products contaminated with a small fraction of higher level *Salmonella* have high-virulent.

632 Importantly, while our study used *Salmonella* as a proxy to define *Salmonella* subgroups  
633 that differ in virulence, it is becoming increasingly clear that there is substantial diversity



## Assessing salmonellosis risk in raw chicken parts using QMRA

634 and heterogeneity within many *Salmonella* serotypes. This is particularly apparent and  
635 important for *Salmonella* Kentucky, which represents at least two distinct clades, one that  
636 is virulence attenuated and common in chickens in the US (representing predominantly  
637 ST 152) and one that appears highly virulent and often is resistant to multiple antibiotics  
638 (ST 198) (Tate et al., 2022), and potentially other clades when using different  
639 nomenclature (Richards, Kue, et al., 2023). In our study here, *Salmonella* Kentucky thus  
640 represents a proxy for *Salmonella* Kentucky ST 152. In such instances, future risk  
641 assessments will benefit from approaches that consider evolutionary-supported  
642 definitions of *Salmonella* clades that differ in virulence [for example, as defined by WGS  
643 or Multilocus Sequence Typing (MLST)].

### 644 **Conclusions**

645 Contamination with high-levels of high-virulent serotypes is relatively rare in finished  
646 chicken parts. Yet this risk assessment suggests that most of the public health risk from  
647 chicken parts is concentrated in those rare products with high-levels of high-virulent  
648 serotypes. This conclusion is consistent with multiple previous risk assessments  
649 (Lambertini et al., 2019; Lambertini et al., 2021; Sampedro et al., 2024) for individual  
650 finished poultry products that build more detailed models of potentially confounding  
651 factors like lot-to-lot variation and imperfect testing. Our work advances these previous  
652 efforts by incorporating a serotype-specific DR approach based on epidemiological data  
653 and using more recent HACCP verification data that directly measure the high-level tail  
654 of the *Salmonella* contamination distribution. Therefore, this study supports a growing  
655 consensus that public health could be improved by *Salmonella* risk management  
656 strategies targeted to reduce high-levels of high-virulent serotypes so that the poultry  
657 industry is appropriately incentivized to manage the *Salmonella* risk in finished products  
658 by reducing the highest risk outcomes. In addition, our study supports that limited public  
659 health benefits would be gained from the control of low virulent serotypes (such as the  
660 virulence attenuated *Salmonella* Kentucky clade circulating in the U.S.) (Tate et al., 2022).  
661 This is important as regulatory policies centered on *Salmonella* prevalence alone may  
662 implicitly or explicitly encourage reductions of virulence attenuated *Salmonella*, such as  
663 Kentucky. This may not only not show measurable public health outcomes, but may have  
664 negative consequences, such as facilitating increased prevalence and emergence of  
665 other, possibly high-virulent *Salmonella* serotypes.

### 666 **Acknowledgments**

667 This study was supported by a US Poultry and Egg Association grant to Stasiewicz and  
668 Wiedmann, for Project #BRF-015 Risk Assessment Comparing Alternative Approaches  
669 to Regulating *Salmonella* in Poultry by Public Health Impact Factors. In addition, both  
670 Stasiewicz and Wiedmann are members of a Coalition for Poultry Safety Reform which  
671 includes volunteer members from the poultry industry, consumer groups, and academics.



## Assessing salmonellosis risk in raw chicken parts using QMRA

### 672 **References**

- 673 Barrow, P. A., Jones, M. A., Smith, A. L., & Wigley, P. (2012). The long view: *Salmonella* – the  
674 last forty years. *Avian Pathology*, 41, 413-420. <https://doi.org/10.1080/03079457.2012.718071>
- 675 Buchanan, R. L., Gorris, L. G. M., Hayman, M. M., Jackson, T. C., & Whiting, R. C. (2017). A  
676 review of *Listeria monocytogenes*: An update on outbreaks, virulence, dose-response, ecology,  
677 and risk assessments. *Food Control*, 75, 1-13. <https://doi.org/10.1016/j.foodcont.2016.12.016>
- 678 CDC. (2018). National Health and Nutrition Examination Survey: NHANES 2013-2014. Centers  
679 for Disease Control and Prevention.  
680 <https://www.cdc.gov/nchs/nhanes/search/datapage.aspx?Component=Dietary&CycleBeginYear=2013>. Accessed Feb 28, 2024.  
681
- 682 CDC (2023). *Salmonella* Outbreaks Associated with Not Ready-to-Eat Breaded, Stuffed  
683 Chicken Products—United States, 1998–2022. *Morbidity and Mortality Weekly Report*, 72, 484.  
684 <http://dx.doi.org/10.15585/mmwr.mm7218a2>. Accessed Feb 28, 2024.
- 685 Chavez-Velado, D. R., Vargas, D. A., & Sanchez-Plata, M. X. (2024). Bio-Mapping *Salmonella*  
686 and *Campylobacter* Loads in Three Commercial Broiler Processing Facilities in the United  
687 States to Identify Strategic Intervention Points. *Foods*, 13.  
688 <https://doi.org/10.3390/foods13020180>
- 689 Cheng, R. A., Eade, C. R., & Wiedmann, M. (2019). Embracing Diversity: Differences in  
690 Virulence Mechanisms, Disease Severity, and Host Adaptations Contribute to the Success of  
691 Nontyphoidal *Salmonella* as a Foodborne Pathogen. *Frontiers in Microbiology*, 10, 1368.  
692 <https://doi.org/10.3389/fmicb.2019.01368>
- 693 Cohn, A., Gremillion, T., Hedberg, C., Kincheloe, J., Robach, M., Stasiewicz, M., & Wiedmann,  
694 M. (2023). Risk Management Options to Reduce Human Salmonellosis Cases Due to  
695 Consumption of Raw Poultry. *Food Protection Trends*, 43. <https://doi.org/10.4315/FPT-22-035>
- 696 Cosby, D. E., Cox, N. A., Harrison, M. A., Wilson, J. L., Buhr, R. J., & Fedorka-Cray, P. J.  
697 (2015). *Salmonella* and antimicrobial resistance in broilers: A review. *Journal of applied poultry*  
698 *research*, 24, 408-426. <https://doi.org/10.3382/japr/pfv038>
- 699 Delignette-Muller, M.-L., & Dutang, C. (2015). Package 'fitdistrplus': Help to Fit of a Parametric  
700 Distribution to Non-Censored or Censored Data. In CRAN (Version 1.1-11) [https://cran.r-](https://cran.r-project.org/web/packages/fitdistrplus/index.html)  
701 [project.org/web/packages/fitdistrplus/index.html](https://cran.r-project.org/web/packages/fitdistrplus/index.html)
- 702 Dórea, F. C., Cole, D. J., Hofacre, C., Zamperini, K., Mathis, D., Doyle, M. P., Lee, M. D., &  
703 Maurer, J. J. (2010). Effect of *Salmonella* vaccination of breeder chickens on contamination of  
704 broiler chicken carcasses in integrated poultry operations. *Applied and environmental*  
705 *microbiology*, 76, 7820-7825. <https://doi.org/10.1128/aem.01320-10>
- 706 Fenske, G. J., Pouzou, J. G., Pouillot, R., Taylor, D. D., Costard, S., & Zagmutt, F. J. (2023).  
707 The genomic and epidemiological virulence patterns of *Salmonella enterica* serovars in the  
708 United States. *PloS one*, 18, e0294624. <https://doi.org/10.1371/journal.pone.0294624>

## Assessing salmonellosis risk in raw chicken parts using QMRA

- 709 Ferrari, R. G., Rosario, D. K. A., Cunha-Neto, A., Mano, S. B., Figueiredo, E. E. S., & Conte-  
710 Junior, C. A. (2019). Worldwide Epidemiology of *Salmonella* Serovars in Animal-Based Foods: a  
711 Meta-analysis. *Applied and Environmental Microbiology*, 85, e00591-00519.  
712 <https://doi.org/doi:10.1128/AEM.00591-19>
- 713 Fierer, J., & Guiney, D. G. (2001). Diverse virulence traits underlying different clinical outcomes  
714 of *Salmonella* infection. *Journal of Clinical Investigation*, 107, 775-780.  
715 <https://doi.org/10.1172/JCI12561>
- 716 Foley, S. L., R. Nayak, I. B. Hanning, T. J. Johnson, J. Han, & S. C. Ricke. (2011). Population  
717 Dynamics of *Salmonella enterica* Serotypes in Commercial Egg and Poultry Production. *Applied*  
718 *and Environmental Microbiology*, 77:4273-4279. <https://doi.org/10.1128%2FAEM.00598-11>
- 719 Grimont, P., & Weill, F. (2007). WHO collaborating centre for reference and research on  
720 *Salmonella*. Antigenic formulae of the *Salmonella* serovars, 6-10.  
721 [https://www.researchgate.net/publication/283428414\\_Antigenic\\_Formulae\\_of\\_the\\_Salmonella\\_serovars\\_9th\\_ed\\_Paris\\_WHO\\_Collaborating\\_Centre\\_for\\_Reference\\_and\\_Research\\_on\\_Salmonella](https://www.researchgate.net/publication/283428414_Antigenic_Formulae_of_the_Salmonella_serovars_9th_ed_Paris_WHO_Collaborating_Centre_for_Reference_and_Research_on_Salmonella)  
722 [nella](https://www.researchgate.net/publication/283428414_Antigenic_Formulae_of_the_Salmonella_serovars_9th_ed_Paris_WHO_Collaborating_Centre_for_Reference_and_Research_on_Salmonella)
- 724 Grosjean, P., & Ibanez, F. (2018). Package 'pastecs': Package for Analysis of Space-Time  
725 Ecological Series. In CRAN (Version 1.3.21) <https://CRAN.R-project.org/package=pastecs>
- 726 Hofacre, C. L., Rosales, A. G., Da Costa, M., Cookson, K., Schaeffer, J., & Jones, M. K. (2021).  
727 Immunity and protection provided by live modified vaccines against paratyphoid *Salmonella* in  
728 poultry—an applied perspective. *Avian Diseases*, 65, 295-302.  
729 <https://doi.org/10.1637/aviandiseases-D-20-00126>
- 730 Jackson, B. R., Griffin, P. M., Cole, D., Walsh, K. A., & Chai, S. J. (2013). Outbreak-associated  
731 *Salmonella enterica* serotypes and food Commodities, United States, 1998-2008. *Emerging*  
732 *Infectious Diseases*, 19, 1239-1244. <https://doi.org/10.3201/eid1908.121511>
- 733 Jones, T. F., Ingram, L. A., Cieslak, P. R., Vugia, D. J., Tobin-D'Angelo, M., Hurd, S., Medus,  
734 C., Cronquist, A., & Angulo, F. J. (2008). Salmonellosis outcomes differ substantially by  
735 serotype. *Journal of Infectious Diseases*, 198, 109-114. <https://doi.org/10.1086/588823>
- 736 Jongenburger, I., Den Besten, H. M. W., & Zwietering, M. H. (2015). Statistical aspects of food  
737 safety sampling. *Annual Review Food Science and Technology*, 6, 479-503.  
738 <https://doi.org/10.1146/annurev-food-022814-015546>
- 739 Kim, S. A., Park, S. H., Lee, S. I., & Ricke, S. C. (2017). Development of a rapid method to  
740 quantify *Salmonella* Typhimurium using a combination of MPN with qPCR and a shortened time  
741 incubation. *Food Microbiology*, 65, 7-18. <https://doi.org/10.1016/j.fm.2017.01.013>
- 742 Lambertini, E., Ruzante, J. M., Chew, R., Apodaca, V. L., & Kowalczyk, B. B. (2019). The public  
743 health impact of different microbiological criteria approaches for *Salmonella* in chicken parts.  
744 *Microbial Risk Analysis*, 12, 44-59. <https://doi.org/10.1016/j.mran.2019.06.002>

## Assessing salmonellosis risk in raw chicken parts using QMRA

- 745 Lambertini, E., Ruzante, J. M., & Kowalczyk, B. B. (2021). The Public Health Impact of  
746 Implementing a Concentration-Based Microbiological Criterion for Controlling *Salmonella* in  
747 Ground Turkey. *Risk Analysis*, 41, 1376-1395. <https://doi.org/10.1111/risa.13635>
- 748 Luvsansharav, U. O., Vieira, A., Bennett, S., Huang, J., Healy, J. M., Hoekstra, R. M., Bruce, B.  
749 B., & Cole, D. (2019). *Salmonella* Serotypes: A Novel Measure of Association with Foodborne  
750 Transmission. *Foodborne Pathogens and Diseases*, 17, 151-155.  
751 <https://doi.org/10.1089/fpd.2019.2641>
- 752 Mataragas, M., Drosinos, E. H., Tsola, E., & Zoiopoulos, P. E. (2012). Integrating statistical  
753 process control to monitor and improve carcasses quality in a poultry slaughterhouse  
754 implementing a HACCP system. *Food Control*, 28, 205-211.  
755 <https://doi.org/10.1016/j.foodcont.2012.05.032>
- 756 Miller, R. A., & Wiedmann, M. (2016). The cytolethal distending toxin produced by nontyphoidal  
757 *Salmonella* serotypes Javiana, Montevideo, Oranienburg, and Mississippi induces DNA damage  
758 in a manner similar to that of serotype Typhi. *MBio*, 7, 10-1128.  
759 <https://doi.org/10.1128/mbio.02109-16>
- 760 NACMCF. (2024). Response to Questions Posed by the Food Safety and Inspection Service:  
761 Enhancing *Salmonella* Control in Poultry Products. *Journal of Food Protection*, 87, 100168.  
762 <https://doi.org/10.1016/j.jfp.2023.100168>
- 763 Nauta, M. J., van der Wal, F. J., Putirulan, F. F., Post, J., van de Kassteele, J., & Bolder, N. M.  
764 (2009). Evaluation of the "testing and scheduling" strategy for control of *Campylobacter* in  
765 broiler meat in The Netherlands. *International Journal of Food Microbiology*, 134, 216-222.  
766 <https://doi.org/10.1016/j.ijfoodmicro.2009.06.014>
- 767 Plummer, M. (2022). JAGS: Just Another Gibbs Sampler. In (Version 4.3.1) [https://mcmc-](https://mcmc-jags.sourceforge.io/)  
768 [jags.sourceforge.io/](https://mcmc-jags.sourceforge.io/)
- 769 Plummer, M., Stukalov, A., & Denwood, M. (2023). Package 'rjags': Interface to the JAGS  
770 MCMC library. In CRAN <https://cran.r-project.org/web/packages/rjags/rjags.pdf>
- 771 Office of Disease Prevention and Health Promotion. (2023). US Department of Health and  
772 Human Services: Healthy People 2030. [https://health.gov/healthypeople/objectives-and-](https://health.gov/healthypeople/objectives-and-data/browse-objectives/foodborne-illness)  
773 [data/browse-objectives/foodborne-illness](https://health.gov/healthypeople/objectives-and-data/browse-objectives/foodborne-illness). Accessed Feb 28, 2024.
- 774 R Core Team. (2023). R: A Language and Environment for Statistical Computing. In (Version  
775 4.3.1) R Foundation for Statistical Computing. <https://www.r-project.org/>
- 776 Rasschaert, G., Houf, K., Godard, C., Wildemaue, C., Pastuszczak-Frąk, M., & De Zutter, L.  
777 (2008). Contamination of Carcasses with *Salmonella* during Poultry Slaughter. *Journal of Food*  
778 *Protection*, 71, 146-152. <https://doi.org/10.4315/0362-028X-71.1.146>
- 779 Rasschaert, G., L. De Zutter, L. Herman, and M. Heyndrickx. (2020). *Campylobacter*  
780 contamination of broilers: the role of transport and slaughterhouse. *International Journal of Food*  
781 *Microbiology*, <https://doi.org/10.1016/j.ijfoodmicro.2020.108564>

## Assessing salmonellosis risk in raw chicken parts using QMRA

- 782 Richards, A. K., Kue, S., Norris, C. G., & Shariat, N. W. (2023). Genomic and phenotypic  
783 characterization of *Salmonella enterica* serovar Kentucky. *Microbial Genomics*, 9.  
784 <https://doi.org/10.1099/mgen.0.001089>
- 785 Richards, A. K., Siceloff, A. T., Simmons, M., Tillman, G. E., & Shariat, N. W. (2023). Poultry  
786 processing interventions reduce *Salmonella* serovar complexity on post-chill young chicken  
787 carcasses as determined by deep serotyping. *Journal of Food Protection*, 100208.  
788 <https://doi.org/10.1016/j.jfp.2023.100208>
- 789 Ripley, B., & Venables, B. (2023). Package 'MASS': Support Functions and Datasets for  
790 Venables and Ripley's MASS. In CRAN (Version 7.3-60) [https://cran.r-](https://cran.r-project.org/web/packages/MASS/index.html)  
791 [project.org/web/packages/MASS/index.html](https://cran.r-project.org/web/packages/MASS/index.html)
- 792 Sampedro, F., Garcés-Vega, F., Strickland, A. J., & Hedberg, C. W. (2024). Developing a risk  
793 management framework to improve public health outcomes by enumerating and serotyping  
794 *Salmonella* in ground turkey. *Epidemiology & Infection*, 152, e12.  
795 <https://doi.org/10.1017/s0950268823002029>
- 796 Scallan, E., Hoekstra, R. M., Angulo, F. J., Tauxe, R. V., Widdowson, M. A., Roy, S. L., Jones,  
797 J. L., & Griffin, P. M. (2011). Foodborne illness acquired in the United States--major pathogens.  
798 *Emerging Infectious Diseases*, 17, 7-15. <https://doi.org/10.3201/eid1701.p11101>
- 799 Siceloff, A. T., Waltman, D., & Shariat, N. W. (2022). Regional *Salmonella* Differences in United  
800 States Broiler Production from 2016 to 2020 and the Contribution of Multiserovar Populations to  
801 *Salmonella* Surveillance. *Applied and Environmental Microbiology*, 88, e0020422.  
802 <https://doi.org/10.1128/aem.00204-22>
- 803 Strickland, A. J., Sampedro, F., & Hedberg, C. W. (2023). Quantitative Risk Assessment of  
804 *Salmonella* in Ground Beef Products and the Resulting Impact of Risk Mitigation Strategies on  
805 Public Health. *Journal of Food Protection*, 86, 100093. <https://doi.org/10.1016/j.jfp.2023.100093>
- 806 Tate, H., C. H. Hsu, J. C. Chen, J. Han, S. L. Foley, J. P. Folster, L. K. Francois Watkins, J.  
807 Reynolds, G. E. Tillman, E. Nyirabahizi, and S. Zhao. (2022). Genomic Diversity, Antimicrobial  
808 Resistance, and Virulence Gene Profiles of *Salmonella* Serovar Kentucky Isolated from  
809 Humans, Food, and Animal Ceca Content Sources in the United States. *Foodborne Pathogens*  
810 *and Diseases*. 19, 509-521. <https://doi.org/10.1089/fpd.2022.0005>
- 811 Teunis, P. F., & Havelaar, A. H. (2000). The Beta Poisson dose-response model is not a single-  
812 hit model. *Risk Analysis*, 20, 513-520. <https://doi.org/10.1111/0272-4332.204048>
- 813 Teunis, P. F. M. (2022). Dose response for *Salmonella* Typhimurium and Enteritidis and other  
814 nontyphoid enteric *salmonellae*. *Epidemics*, 41, 100653.  
815 <https://doi.org/10.1016/j.epidem.2022.100653>
- 816 Teunis, P. F. M., Kasuga, F., Fazil, A., Ogden, I. D., Rotariu, O., & Strachan, N. J. C. (2010).  
817 Dose-response modeling of *Salmonella* using outbreak data. *International Journal of Food*  
818 *Microbiology*, 144, 243-249. <https://doi.org/10.1016/j.ijfoodmicro.2010.09.026>



## Assessing salmonellosis risk in raw chicken parts using QMRA

- 819 The Interagency Food Safety Analytics Collaboration. (2022). Foodborne illness source  
820 attribution estimates for 2019 for *Salmonella*, *Escherichia coli* O157, *Listeria monocytogenes*,  
821 and *Campylobacter* using multi-year outbreak surveillance data, United States.  
822 <https://www.cdc.gov/foodsafety/ifsac/pdf/P19-2019-report-TriAgency-508.pdf>. Accessed Feb 28,  
823 2024.
- 824 The Interagency Food Safety Analytics Collaboration. (2023). Foodborne illness source  
825 attribution estimates for 2019 for *Salmonella*, *Escherichia coli* O157, *Listeria monocytogenes*,  
826 and *Campylobacter* using multi-year outbreak surveillance data, United States.  
827 <https://www.cdc.gov/foodsafety/ifsac/pdf/P19-2019-report-TriAgency-508.pdf>. Accessed Feb 28,  
828 2024.
- 829 Thompson, C. P., Doak, A. N., Amirani, N., Schroeder, E. A., Wright, J., Kariyawasam, S.,  
830 Lamendella, R., & Shariat, N. W. (2018). High-Resolution Identification of Multiple *Salmonella*  
831 Serovars in a Single Sample by Using CRISPR-SeroSeq. *Applied and Environmental*  
832 *Microbiology*, 84, e01859-01818. <https://doi.org/doi:10.1128/AEM.01859-18>
- 833 United States Census Bureau. (2023). U.S. and World Population Clock. Retrieved 2023-11-7  
834 from <https://www.census.gov/popclock/>. Accessed Feb 28, 2024.
- 835 USDA-ERS. (2023). Food Availability and Consumption. [https://www.ers.usda.gov/data-](https://www.ers.usda.gov/data-products/ag-and-food-statistics-charting-the-essentials/food-availability-and-consumption/)  
836 [products/ag-and-food-statistics-charting-the-essentials/food-availability-and-consumption/](https://www.ers.usda.gov/data-products/ag-and-food-statistics-charting-the-essentials/food-availability-and-consumption/).  
837 Accessed Feb 28, 2024.
- 838 USDA-FSIS. (2012). The nationwide microbiological baseline data collection program: raw  
839 chicken parts survey, January 2012–August 2012. Food Safety and Inspection Service, US  
840 Department of Agriculture, Washington, DC. , 28.  
841 [https://www.fsis.usda.gov/sites/default/files/media\\_file/2020-](https://www.fsis.usda.gov/sites/default/files/media_file/2020-07/Baseline_Data_Raw_Chicken_Parts.pdf)  
842 [07/Baseline Data Raw Chicken Parts.pdf](https://www.fsis.usda.gov/sites/default/files/media_file/2020-07/Baseline_Data_Raw_Chicken_Parts.pdf). Accessed Feb 28, 2024.
- 843 USDA-FSIS. (2014). MLG Appendix 2.05: Most Probable Number Procedure and Tables.  
844 [https://www.fsis.usda.gov/sites/default/files/media\\_file/2021-03/MLG-Appendix-2.pdf](https://www.fsis.usda.gov/sites/default/files/media_file/2021-03/MLG-Appendix-2.pdf). Accessed  
845 Feb 28, 2024.
- 846 USDA-FSIS. (2016). New performance standards for *Salmonella* and *Campylobacter* in not-  
847 ready-to-eat comminuted chicken and turkey products and raw chicken parts and changes to  
848 related agency verification procedures: Response to comments and announcement of  
849 implementation schedule. Fed Reg, 81, 7285-7300.
- 850 USDA-FSIS. (2022). Proposed Framework for Controlling *Salmonella* in Poultry. Fed Reg, 87,  
851 62784-62786.
- 852 USDA-FSIS. (2023a). FY 2022-2026 Food Safety Key Performance Indicator. Retrieved from  
853 [https://www.fsis.usda.gov/inspection/inspection-programs/inspection-poultry-products/reducing-](https://www.fsis.usda.gov/inspection/inspection-programs/inspection-poultry-products/reducing-salmonella-poultry/salmonella-0)  
854 [salmonella-poultry/salmonella-0](https://www.fsis.usda.gov/inspection/inspection-programs/inspection-poultry-products/reducing-salmonella-poultry/salmonella-0). Accessed Feb 28, 2024.
- 855 USDA-FSIS. (2023b). Laboratory Sampling Data. Retrieved from  
856 <https://www.fsis.usda.gov/science-data/data-sets-visualizations/laboratory-sampling-data>.  
857 Accessed Feb 28, 2024.



## Assessing salmonellosis risk in raw chicken parts using QMRA

- 858 USDA-FSIS. (2023c). MLG 4.14 Isolation and Identification of Salmonella from Meat, Poultry,  
859 Pasteurized Egg, Siluriformes (Fish) Products and Carcass and Environmental Sponges  
860 Retrieved from [https://www.fsis.usda.gov/sites/default/files/media\\_file/documents/MLG-4.14.pdf](https://www.fsis.usda.gov/sites/default/files/media_file/documents/MLG-4.14.pdf).  
861 Accessed Feb 28, 2024.
- 862 USDA-FSIS. (2023d). *Salmonella* By the Numbers.  
863 [https://www.fsis.usda.gov/inspection/inspection-programs/inspection-poultry-products/reducing-](https://www.fsis.usda.gov/inspection/inspection-programs/inspection-poultry-products/reducing-salmonella-poultry/salmonella)  
864 [salmonella-poultry/salmonella](https://www.fsis.usda.gov/inspection/inspection-programs/inspection-poultry-products/reducing-salmonella-poultry/salmonella). Accessed Feb 28, 2024.
- 865 USDA-FSIS. (2023e). *Salmonella* in Not-Ready-To-Eat Breaded Stuffed Chicken Products. Fed  
866 Reg, 88, 26249-26271.
- 867 WHO/FAO. (2002). Risk assessments of *Salmonella* in eggs and broiler chickens. Food &  
868 Agriculture Org.
- 869 Wickham, H. (2022). Package 'stringr': Simple, Consistent Wrappers for Common String  
870 Operations. In CRAN (Version 1.5.0) <https://CRAN.R-project.org/package=stringr>
- 871 Wickham, H., & Bryan, J. (2023). Package 'readxl': Read Excel Files. In CRAN (Version 1.4.3)  
872 <https://cran.r-project.org/web/packages/readxl/index.html>
- 873 Williams, M. S., & Ebel, E. D. (2012). Methods for fitting a parametric probability distribution to  
874 most probable number data. *International Journal of Food Microbiology*, 157, 251-258.  
875 <https://doi.org/10.1016/j.ijfoodmicro.2012.05.014>
- 876 Williams, M. S., Ebel, E. D., & Allender, H. D. (2015). Industry-level changes in microbial  
877 contamination on market hog and broiler chicken carcasses between two locations in the  
878 slaughter process. *Food Control*, 51, 361-370. <https://doi.org/10.1016/j.foodcont.2014.11.039>
- 879 Williams, M. S., Ebel, E. D., & Golden, N. J. (2017). Using indicator organisms in performance  
880 standards for reducing pathogen occurrence on beef carcasses in the United States. *Microbial*  
881 *Risk Analysis*, 6, 44-56. <https://doi.org/10.1016/j.mran.2017.01.001>
- 882 Williams, M. S., Ebel, E. D., Golden, N. J., Saini, G., Nyirabahizi, E., & Clinch, N. (2022).  
883 Assessing the effectiveness of performance standards for *Salmonella* contamination of chicken  
884 parts. *International Journal of Food Microbiology*, 378, 109801.  
885 <https://doi.org/10.1016/j.ijfoodmicro.2022.109801>
- 886 Xie, Y. (2023). Package 'knitr': A General-Purpose Package for Dynamic Report Generation in  
887 R. In CRAN <https://cran.r-project.org/web/packages/knitr/index.html>
- 888

889 **Tables**

890 Table 1. Summary of collected USDA-FSIS publicly available datasets used in this project to characterize *Salmonella*  
 891 contamination in chicken parts by presence, level, and serotype.

| Sampling program                                                                                                  | Date                  | Available <i>Salmonella</i> relevant data                   | Number of records | Source                                     |
|-------------------------------------------------------------------------------------------------------------------|-----------------------|-------------------------------------------------------------|-------------------|--------------------------------------------|
| The Nationwide Microbiological Baseline Data Collection Program: Raw Chicken Parts Survey (Baseline parts survey) | 01/26/2012-08/14/2012 | Screening <sup>a</sup> , serotype, level (MPN) <sup>b</sup> | 2,496             | FOIA: 2023-FSIS-00047-F <sup>d</sup>       |
| USDA-FSIS routine microbiological sampling of raw chicken parts (HACCP verification data)                         | 01/30/2023-06/30/2023 | Screening, serotype, level (qPCR) <sup>c</sup>              | 6,203             | FSIS laboratory sampling data <sup>e</sup> |
|                                                                                                                   | 10/03/2022-01/29/2023 | Screening, serotype                                         | 4,928             | FSIS laboratory sampling data              |
|                                                                                                                   | 03/26/2015-07/01/2022 | Screening, serotype                                         | 70,566            | FSIS laboratory sampling data              |

892 <sup>a</sup> *Salmonella* Screening limit of detection: 1 CFU/30 mL (0.0074 CFU/g)

893 <sup>b</sup> Quantifiable range for MPN enumeration method: 0.33-11 CFU/mL (0.0073 MPN/g-2.4 MPN/g)

894 <sup>c</sup> Quantifiable range for qPCR enumeration method: 10<sup>1</sup>-10<sup>7</sup> CFU/mL (4.5x10<sup>1</sup> CFU/g-4.5x10<sup>7</sup>CFU/g)

895 <sup>d</sup> [https://www.fsis.usda.gov/sites/default/files/media\\_file/documents/FOIA-Logs\\_Q1-2FY23.pdf](https://www.fsis.usda.gov/sites/default/files/media_file/documents/FOIA-Logs_Q1-2FY23.pdf)

896 <sup>e</sup> (USDA-FSIS, 2023b)

897

898 Table 2. Observed and fitted proportions of *Salmonella* in level intervals of interest.

| Counts from                                                                              | Total | Negative,<br>< LOD <sup>a</sup> of<br>0.0074 CFU/g | Positive,<br>> LOD of<br>0.0074 CFU/g | Positive,<br>>1 CFU/g     | Positive,<br>>10 CFU/g |
|------------------------------------------------------------------------------------------|-------|----------------------------------------------------|---------------------------------------|---------------------------|------------------------|
| <i>Baseline parts survey, data from 01/25/2012-08/13/2012</i>                            |       |                                                    |                                       |                           |                        |
| Observed                                                                                 | 2,496 | 1,774<br>(71.1%)                                   | 722<br>(28.9%)                        | 38<br>(1.5%)              | NA <sup>b</sup>        |
| Fitted Lognormal ( $\mu = -3.19, \sigma = 1.29$ )                                        |       | 79.4%                                              | 20.6%                                 | 0.653%                    | 0.0558%                |
| <i>HACCP verification data for raw chicken parts, data from 01/30/2023 to 06/30/2023</i> |       |                                                    |                                       |                           |                        |
| Observed                                                                                 | 6,200 | 5,661<br>(91.3%)                                   | 539<br>(8.7%)                         | 56 <sup>c</sup><br>(0.9%) | 25<br>(0.4%)           |
| Fitted Lognormal ( $\mu = -4.85, \sigma = 2.44$ )                                        |       | 86.8%                                              | 13.2%                                 | 2.3%                      | 0.8%                   |

899 <sup>a</sup> The limit of detection (LOD) was calculated by multiplying the limit of detection of the screening assay by the volume of  
 900 rinsate buffer divided by the mass of chicken: (1 MPN/30 mL rinsate) x (400 mL rinsate /1814 g parts) = 0.0074 CFU/g  
 901 parts.

902 <sup>b</sup> Not available because of MPN method's maximum quantifiable range is 11 MPN/mL rinsate (about 2.4 CFU/g parts).

903 <sup>c</sup> qPCR method's quantifiable range is from 10 to 10,000,000 CFU/mL. Results reported as <10 CFU/mL values (461  
 904 counts total) were counted in the positive bin, but not for positive and >1 CFU/g or >10 CFU/g because the exact value  
 905 was not known. Distribution fitting treats these censored data appropriately by interval censoring this between LOD and  
 906 10 CFU/g.

907

908 Table 3. *Salmonella* serotype distributions in three different datasets. A longer intermediate time HACCP verification data  
 909 from 2015-2022 was used for QMRA.

| Why Included in QMRA Model                                                         | Serotype                     | Baseline parts survey (01/26/2012-08/14/2012) |           | HACCP Verification Data (03/26/2015-07/01/2022) |           | HACCP Verification Data (10/03/2022-06/30/2023) |           |
|------------------------------------------------------------------------------------|------------------------------|-----------------------------------------------|-----------|-------------------------------------------------|-----------|-------------------------------------------------|-----------|
|                                                                                    |                              | Count                                         | Frequency | Count                                           | Frequency | Count                                           | Frequency |
| Commonly found in chicken but rare in human illnesses (Lower virulence)            | Kentucky                     | 198                                           | 30.1%     | 2,203                                           | 29.2%     | 216                                             | 22.6%     |
| Commonly associated with human illnesses in the U.S., KPI serotype <sup>b</sup>    | Enteritidis                  | 162                                           | 24.6%     | 1,812                                           | 24.0%     | 229                                             | 24.0%     |
| Commonly associated with human illnesses in the U.S., KPI serotype                 | Infantis                     | 11                                            | 1.7%      | 1,414                                           | 18.7%     | 301                                             | 31.5%     |
| Commonly associated with human illnesses in the U.S., KPI serotype                 | Typhimurium                  | 60                                            | 9.1%      | 643                                             | 8.5%      | 108                                             | 11.3%     |
| Association with human illness, Good dose-response data available in Teunis (2022) | Heidelberg                   | 50                                            | 7.6%      | 225                                             | 3.0%      | 2                                               | 0.2%      |
| Non-motile Typhimurium                                                             | I 4,[5],12:i:-               | 93                                            | 14.1%     | 63                                              | 0.8%      | 6                                               | 0.6%      |
| All other serotypes                                                                | Other serotypes <sup>c</sup> | 84                                            | 12.8%     | 1,195                                           | 15.8%     | 93                                              | 9.7%      |
| Total serotyped counts                                                             | Every serotype               | 658                                           | 100%      | 7,555                                           | 100%      | 955                                             | 100%      |

910 <sup>a</sup> For full data, see the ‘Serotype data summary for parts dataset.xlsx’ file in the GitHub repository.

911 <sup>b</sup> KPI serotype is a Key Performance Indicator serotype defined by USDA-FSIS (USDA-FSIS, 2023a)

912 <sup>c</sup> Other serotypes include all other serotypes as well as any samples where serotypes were unknown such as data  
 913 recorded as “Multiple serotypes”.

914 Table 4. QMRA approaches for assigning available dose-response models for various *Salmonella* serotypes of interest in  
 915 this project.

| Kentucky                                                                                                                                                                                                                                                                                                                                                | Enteritidis                        | Dose-Response (DR) model used for each Serotype                                                               |                                                                                                                                         |                                    |                                                                                       |                      |                                                                                                       |
|---------------------------------------------------------------------------------------------------------------------------------------------------------------------------------------------------------------------------------------------------------------------------------------------------------------------------------------------------------|------------------------------------|---------------------------------------------------------------------------------------------------------------|-----------------------------------------------------------------------------------------------------------------------------------------|------------------------------------|---------------------------------------------------------------------------------------|----------------------|-------------------------------------------------------------------------------------------------------|
|                                                                                                                                                                                                                                                                                                                                                         |                                    | Heidelberg                                                                                                    | Infantis                                                                                                                                | Typhimurium                        | I 4,[5],12:i:-                                                                        | Anatum               | Others                                                                                                |
| QMRA approach 1. All serotypes equal<br>Beta-Poisson model and parameters from WHO/FAO (2002) for all serotypes                                                                                                                                                                                                                                         |                                    |                                                                                                               |                                                                                                                                         |                                    |                                                                                       |                      |                                                                                                       |
| QMRA approach 2. Reduced virulence for Kentucky<br>Anatum DR parameters for Beta-Poisson model with parameters from WHO/FAO (2002) for all serotypes that are not Kentucky<br>Beta-Poisson model<br>(Center for Advancing Microbial Risk Assessment, 2024) using a McCullogh & Elsele (1951) challenge study data to represent reduced risk of Kentucky |                                    |                                                                                                               |                                                                                                                                         |                                    |                                                                                       |                      |                                                                                                       |
| QMRA approach 3. Serotype-specific DR parameters collected from Teunis (2022) <sup>a</sup>                                                                                                                                                                                                                                                              |                                    |                                                                                                               |                                                                                                                                         |                                    |                                                                                       |                      |                                                                                                       |
| Anatum DR parameters were used to represent low-virulent serotype                                                                                                                                                                                                                                                                                       | Enteritidis specific DR parameters | Heidelberg specific DR parameters, representing high-virulent serotype and having reliable sample size (>100) | Heidelberg specific DR parameters representing high-virulent serotype because Infantis parameters did not have reliable sample size (8) | Typhimurium specific DR parameters | Typhimurium specific DR parameters because I 4,[5],12:i:- is a non-motile Typhimurium | Anatum DR parameters | Randomly assign 1 of 4 serotype-specific DR parameters (Typhimurium, Enteritidis, Heidelberg, Anatum) |

916 <sup>a</sup> Hierarchical Beta-Poisson model was used [P(inf) + P(ill|inf)] following multivariate normal hyperdistribution



917 Table 5. Comparing relative risk of illnesses using two different *Salmonella* distributions and three dose-response model  
 918 approaches.

| Final Product Standard being evaluated <sup>a</sup> |               |                                       | Food loss (% products meeting Implication for the contamination profile described <sup>b</sup> ) | Relative Risk <sup>c</sup> of Illness per Serving from Characterized Contamination Compared to Baseline Illness <sup>d</sup><br><i>Salmonella</i> level distribution input from Baseline parts survey 2012<br>( $\mu = -3.19, \sigma = 1.29$ ) |                                             |                                              | Food loss (% products meeting Implication for the contamination profile described <sup>b</sup> ) | Relative Risk <sup>c</sup> of Illness per Serving from Characterized Contamination Compared to Baseline Illness <sup>d</sup><br><i>Salmonella</i> level distribution input from HACCP verification data (01/30/2023-06/30-2023)<br>( $\mu = -4.85, \sigma = 2.44$ ) |                                             |                                              |
|-----------------------------------------------------|---------------|---------------------------------------|--------------------------------------------------------------------------------------------------|------------------------------------------------------------------------------------------------------------------------------------------------------------------------------------------------------------------------------------------------|---------------------------------------------|----------------------------------------------|--------------------------------------------------------------------------------------------------|---------------------------------------------------------------------------------------------------------------------------------------------------------------------------------------------------------------------------------------------------------------------|---------------------------------------------|----------------------------------------------|
| Type                                                | Level (CFU/g) | Serotypes standards applied to        |                                                                                                  | A1. All serotypes equal <sup>e</sup>                                                                                                                                                                                                           | A2. Reduced virulence Kentucky <sup>e</sup> | A3. Serotype-specific DR models <sup>e</sup> |                                                                                                  | A1. All serotypes equal <sup>e</sup>                                                                                                                                                                                                                                | A2. Reduced virulence Kentucky <sup>e</sup> | A3. Serotype-specific DR models <sup>e</sup> |
| Baseline                                            | All           | All                                   | 100%                                                                                             | 100%                                                                                                                                                                                                                                           | 100%                                        | 100%                                         | 100%                                                                                             | 100%                                                                                                                                                                                                                                                                | 100%                                        |                                              |
| Level only                                          | >0.0074       | All                                   | 20.7%                                                                                            | 98.4%                                                                                                                                                                                                                                          | 98.4%                                       | 99.9%                                        | 13.3%                                                                                            | 99.998%                                                                                                                                                                                                                                                             | 99.998%                                     | 99.9999994%                                  |
|                                                     | >1            | All                                   | 0.67%                                                                                            | 68.1%                                                                                                                                                                                                                                          | 68.0%                                       | 91.5%                                        | 2.3%                                                                                             | 99.91%                                                                                                                                                                                                                                                              | 99.91%                                      | 99.9995%                                     |
|                                                     | >10           | All                                   | 0.059%                                                                                           | 37.4%                                                                                                                                                                                                                                          | 37.0%                                       | 63.7%                                        | 0.83%                                                                                            | 99.61%                                                                                                                                                                                                                                                              | 99.6%                                       | 99.99%                                       |
| Level & high-virulent (KPI) <sup>f</sup> serotypes  | >0.0074       | Enteritidis, Infantis, or Typhimurium | 10.6%                                                                                            | 50.2%                                                                                                                                                                                                                                          | 70.2%                                       | 75.3%                                        | 6.8%                                                                                             | 53.2%                                                                                                                                                                                                                                                               | 69.5%                                       | 78.7%                                        |
|                                                     | >1            | Enteritidis, Infantis, or Typhimurium | 0.34%                                                                                            | 34.7%                                                                                                                                                                                                                                          | 48.4%                                       | 69.0%                                        | 1.2%                                                                                             | 53.1%                                                                                                                                                                                                                                                               | 69.4%                                       | 78.7%                                        |
|                                                     | >10           | Enteritidis, Infantis, or Typhimurium | 0.029%                                                                                           | 19.1%                                                                                                                                                                                                                                          | 26.3%                                       | 47.8%                                        | 0.42%                                                                                            | 53.0%                                                                                                                                                                                                                                                               | 69.2%                                       | 78.7%                                        |
| Level & exclude low-virulent serotype               | >0.0074       | All except Kentucky                   | 14.6%                                                                                            | 68.7%                                                                                                                                                                                                                                          | 97.3%                                       | 99.9%                                        | 9.4%                                                                                             | 74.5%                                                                                                                                                                                                                                                               | 98.7%                                       | 99.7%                                        |
|                                                     | >1            | All except Kentucky                   | 0.48%                                                                                            | 47.2%                                                                                                                                                                                                                                          | 67.3%                                       | 91.5%                                        | 1.7%                                                                                             | 74.4%                                                                                                                                                                                                                                                               | 98.6%                                       | 99.7%                                        |
|                                                     | >10           | All except Kentucky                   | 0.041%                                                                                           | 25.5%                                                                                                                                                                                                                                          | 36.6%                                       | 63.7%                                        | 0.59%                                                                                            | 74.2%                                                                                                                                                                                                                                                               | 98.3%                                       | 99.7%                                        |

919 <sup>a</sup> Three candidate final product standards are shown on the left side of the table. On the right side of the standards, the  
 920 relative risk from two different *Salmonella* level distribution inputs

921 <sup>b</sup> Proportion of products meeting the described contamination profile was collected from a simulation from A3.

922 <sup>c</sup> Relative Risk of Illness per Serving (%) is calculated as: The mean number of illnesses estimated from products meeting  
 923 characterized contamination/The mean number of illnesses estimated from all products x 100. The relative risk is  
 924 calculated by running one simulation of 1 million iterations in R. Baseline probability of illness in a serving was scaled to 2  
 925 illness in a million servings.

926 <sup>d</sup> Different scaling factors were used for each approach and the dataset to match the baseline probability of illness per  
927 serving to about 1.9 in a million ( $1.9 \times 10^{-6}$  illness/serving) based on calculations from public health data (Refer to  
928 Simulating Salmonella dose in one serving using a scaling factor to adjust for retail to consumer handling practices in  
929 materials and methods section). The scaling factor accounts for all customer and consumer handling from packing the  
930 finished product to consumption. Baseline mean illness was calculated by multiplying this baseline probability of illness  
931 per serving and the total number of servings in a year.

932 <sup>e</sup> A1: One dose-response model for all serotypes; A2: Reduced virulence for Kentucky; A3: Multiple serotype-specific  
933 dose-response models

934 <sup>f</sup> KPI serotype is a Key Performance Indicator serotype which was defined by USDA-FSIS for poultry as Enteritidis,  
935 Infantis and Typhimurium at the time of this work.

936

937 **Figures**

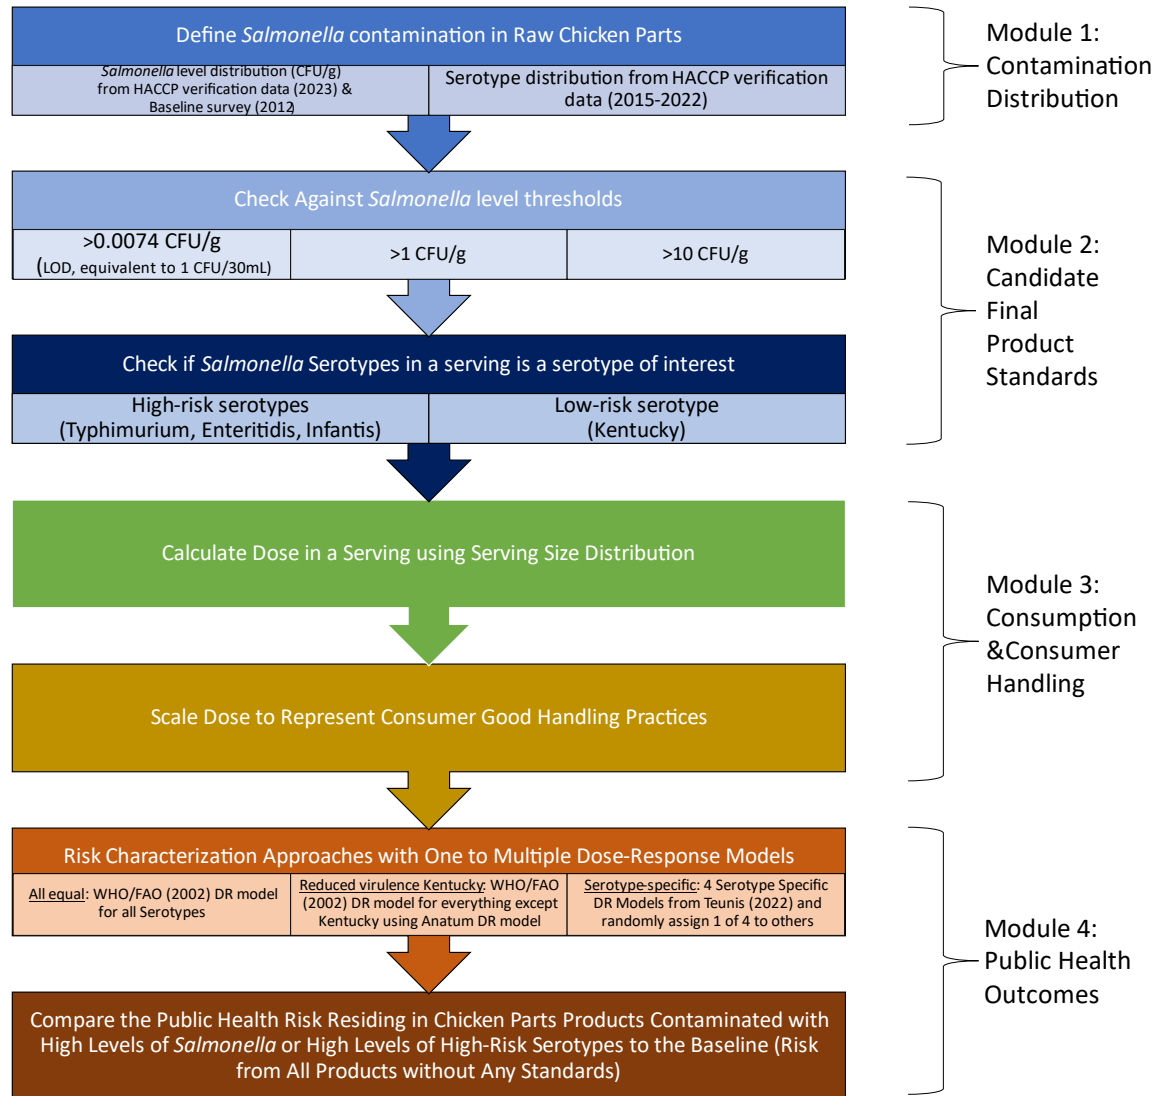

938

939 Figure 1. Quantitative Microbial Risk Assessment framework used in this study.

## Assessing salmonellosis risk in raw chicken parts using QMRA

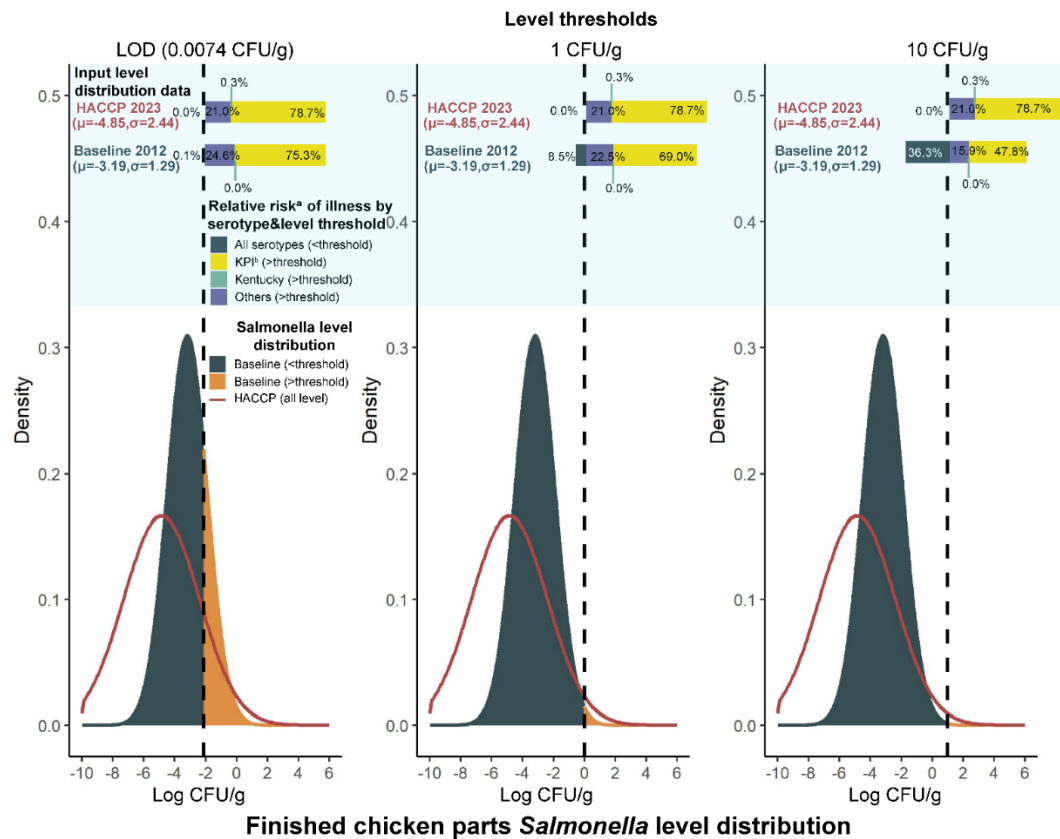

\*Relative Risk of Illness per Serving (%) is calculated as: The mean number of illnesses estimated from products meeting characterized contamination/The mean number of illnesses estimated from all products x 100. The relative risk is calculated by running one simulation of one million iterations in R. The baseline probability of illness in a serving was scaled to about 2 illnesses in a million servings.  
\*\*KPI serotype is a Key Performance Indicator serotype which was defined by USDA-FSIS for poultry as Enteritidis, Infantis and Typhimurium at the time of this work.

940

941 Figure 2. Comparison of the relative risk of illnesses attributed to various *Salmonella* serotype groups above or below  
 942 given level thresholds. Two *Salmonella* level distribution inputs were used, and all results represented are from the  
 943 serotype-specific dose-response approach (A3). The colored layer at the above part of the figure shows the relative risk  
 944 coming from each *Salmonella* level distribution input. The density functions below visualize *Salmonella* level distributions  
 945 from the two different datasets used. The dashed line separates both risk and level distribution into below and above the  
 946 level threshold. The relative risk from different serotypes is divided into three high-virulent KPI serotypes (Enteritidis,  
 947 Infantis, and Typhimurium), a low-virulent serotype Kentucky, and other serotypes, each shown as different colors.

948 **Supplemental Material**

949 Table S1-> *Salmonella* spp. dose-response model parameters used in the QMRA.

| QMRA modeling approaches <sup>a</sup> using this dose-response model                                                     | Serotypes dose-response model used for                                                                   | Parameters used for                                                                                                                                                                                                                                                                                                                                                                         |                                                                                                                                                                                                                                                                                                                                                                                                                                       |
|--------------------------------------------------------------------------------------------------------------------------|----------------------------------------------------------------------------------------------------------|---------------------------------------------------------------------------------------------------------------------------------------------------------------------------------------------------------------------------------------------------------------------------------------------------------------------------------------------------------------------------------------------|---------------------------------------------------------------------------------------------------------------------------------------------------------------------------------------------------------------------------------------------------------------------------------------------------------------------------------------------------------------------------------------------------------------------------------------|
|                                                                                                                          |                                                                                                          | Infection                                                                                                                                                                                                                                                                                                                                                                                   | Illness                                                                                                                                                                                                                                                                                                                                                                                                                               |
| Beta-Poisson model from WHO/FAO (2002)                                                                                   |                                                                                                          |                                                                                                                                                                                                                                                                                                                                                                                             |                                                                                                                                                                                                                                                                                                                                                                                                                                       |
| A1, A2.                                                                                                                  | All serotypes                                                                                            | NA                                                                                                                                                                                                                                                                                                                                                                                          | mean ( $\alpha$ ) = 0.1324<br>mean ( $\beta$ ) = 51.45                                                                                                                                                                                                                                                                                                                                                                                |
| Beta-Poisson model from WHO/FAO (2002) with triangular distribution                                                      |                                                                                                          |                                                                                                                                                                                                                                                                                                                                                                                             |                                                                                                                                                                                                                                                                                                                                                                                                                                       |
| A1.1, A2.1                                                                                                               | All serotypes                                                                                            | NA                                                                                                                                                                                                                                                                                                                                                                                          | ( $\alpha$ )= Triangular(0.0763,0.1324,0.2274)<br>( $\beta$ )= Triangular(38.49,51.45,57.69)                                                                                                                                                                                                                                                                                                                                          |
| Beta-Poisson model from QMRA wiki using data from Meynell G.G. and Meynell E.W. (1958)                                   |                                                                                                          |                                                                                                                                                                                                                                                                                                                                                                                             |                                                                                                                                                                                                                                                                                                                                                                                                                                       |
| A2                                                                                                                       | Kentucky                                                                                                 | NA                                                                                                                                                                                                                                                                                                                                                                                          | MLE estimates<br>$\alpha=3.18 \times 10^{-1}$<br>$N_{50}=3.71 \times 10^4$                                                                                                                                                                                                                                                                                                                                                            |
| Hierarchical Beta-Poisson model [P(inf) + P(ill inf)] following multivariate normal hyperdistribution from Teunis (2022) |                                                                                                          |                                                                                                                                                                                                                                                                                                                                                                                             |                                                                                                                                                                                                                                                                                                                                                                                                                                       |
| A3                                                                                                                       | Typhimurium,<br>I 4,[5],12:i:-<br><br>Enteritidis<br><br>Infantis, Heidelberg<br><br>Kentucky,<br>Anatum | mean(w,z)= (-2.83,3.83)<br>var(w,z)= (3.89,4.36)<br>cov(w,z)=-3.40<br><br>mean(w,z)= (7.21x10 <sup>-2</sup> ,6.68 X 10 <sup>-3</sup> )<br>var(w,z)= (2.26,1.66)<br>cov(w,z)=-1.36<br><br>mean(w,z)= (1.07, 2.08)<br>var(w,z)= (2.93 X10 <sup>1</sup> ,2.21 X 10 <sup>1</sup> )<br>cov(w,z)=-1.90 X10 <sup>1</sup><br><br>mean(w,z)= (-5.99,4.37)<br>var(w,z)= (1.84,2.14)<br>cov(w,z)=-1.68 | mean(w,z)= (-5.13, 3.77)<br>var(w,z)= (2.94,3.93)<br>cov(w,z)= -2.84<br><br>mean(w,z)= (-2.20,-5.71 X 10 <sup>-2</sup> )<br>var(w,z)= (7.00x10 <sup>-1</sup> ,6.09 X 10 <sup>-1</sup> )<br>cov(w,z)= -2.80x10 <sup>-1</sup><br><br>mean(w,z)= (-1.19,2.01)<br>var(w,z)= (3.19x10 <sup>1</sup> ,2.40 X 10 <sup>1</sup> )<br>cov(w,z)= -2.10x10 <sup>1</sup><br><br>mean(w,z)= (-7.54,3.78)<br>var(w,z)= (2.17,2.62)<br>cov(w,z)= -2.04 |



Assessing salmonellosis risk in raw chicken parts using QMRA

950 <sup>a</sup>A1: All serotypes equal; A1.1: All serotypes equal using triangular distribution for DR parameters; A2: Reduced virulence  
951 for Kentucky using Anatum DR model, A2.1: Reduced virulence for Kentucky using Anatum DR model and WHO/FAO  
952 (2002) using triangular distribution for DR parameters; A3: Serotype-specific DR models

Assessing salmonellosis risk in raw chicken parts using QMRA

953 Table S2. Comparing relative risk of illnesses for the implementation of models in R or @RISK for Excel from Baseline  
 954 parts survey input level data.

| Final Product Standard being evaluated <sup>a</sup> |                    |                                       | Food loss (%)<br>products meeting<br>Implication<br>for the<br>contamina<br>tion profile<br>described <sup>b</sup> | Relative Risk <sup>c</sup> of Illness per Serving from Characterized Contamination Compared to Baseline Illness <sup>d</sup> |                                                         |                                                                                         |                                                  |                                                                |                                                                                                                                             |
|-----------------------------------------------------|--------------------|---------------------------------------|--------------------------------------------------------------------------------------------------------------------|------------------------------------------------------------------------------------------------------------------------------|---------------------------------------------------------|-----------------------------------------------------------------------------------------|--------------------------------------------------|----------------------------------------------------------------|---------------------------------------------------------------------------------------------------------------------------------------------|
| Type                                                | Level (CFU/g)      | Serotypes                             |                                                                                                                    | A1 <sup>e</sup> – All serotypes equal - R                                                                                    | A1 <sup>e</sup> – All serotypes equal – @ Risk in Excel | A1.1 <sup>e</sup> – All serotypes equal using triangular distribution - @ Risk in Excel | A2 <sup>e</sup> – Reduced virulence Kentucky – R | A2 <sup>e</sup> – Reduced virulence Kentucky – @ Risk in Excel | A2.1 <sup>e</sup> – Reduced virulence for Kentucky using Anatum Dr model and WHO/FAO (2002) using triangular distribution – @ Risk in Excel |
| Baseline                                            | All (No threshold) | All                                   | 100%                                                                                                               | 100.0%                                                                                                                       | 100.0%                                                  | 100.0%                                                                                  | 100.0%                                           | 100.0%                                                         | 100.0%                                                                                                                                      |
| Level only                                          | >0.0074            | All                                   | 20.7%                                                                                                              | 98.4%                                                                                                                        | 98.3%                                                   | 98.3%                                                                                   | 98.4%                                            | 98.4%                                                          | 98.2%                                                                                                                                       |
|                                                     | >1                 | All                                   | 0.67%                                                                                                              | 68.1%                                                                                                                        | 67.3%                                                   | 66.8%                                                                                   | 68.0%                                            | 68.5%                                                          | 65.1%                                                                                                                                       |
|                                                     | >10                | All                                   | 0.059%                                                                                                             | 37.4%                                                                                                                        | 36.0%                                                   | 35.6%                                                                                   | 37.0%                                            | 41.9%                                                          | 34.3%                                                                                                                                       |
| Level & high-virulent (KPI) <sup>f</sup> serotypes  | >0.0074            | Enteritidis, Infantis, or Typhimurium | 10.6%                                                                                                              | 50.2%                                                                                                                        | 47.3%                                                   | 50.6%                                                                                   | 70.2%                                            | 73.8%                                                          | 63.5%                                                                                                                                       |
|                                                     | >1                 | Enteritidis, Infantis, or Typhimurium | 0.34%                                                                                                              | 34.7%                                                                                                                        | 31.4%                                                   | 34.6%                                                                                   | 48.4%                                            | 52.1%                                                          | 39.9%                                                                                                                                       |
|                                                     | >10                | Enteritidis, Infantis, or Typhimurium | 0.029%                                                                                                             | 19.1%                                                                                                                        | 16.0%                                                   | 20.1%                                                                                   | 26.3%                                            | 32.4%                                                          | 18.4%                                                                                                                                       |
| Level & exclude low-virulent serotype               | >0.0074            | All except Kentucky                   | 14.6%                                                                                                              | 68.7%                                                                                                                        | 66.2%                                                   | 71.5%                                                                                   | 97.3%                                            | 97.1%                                                          | 97.4%                                                                                                                                       |
|                                                     | >1                 | All except Kentucky                   | 0.48%                                                                                                              | 47.2%                                                                                                                        | 44.2%                                                   | 49.7%                                                                                   | 67.3%                                            | 67.5%                                                          | 64.5%                                                                                                                                       |
|                                                     | >10                | All except Kentucky                   | 0.041%                                                                                                             | 25.5%                                                                                                                        | 22.2%                                                   | 27.9%                                                                                   | 36.6%                                            | 41.2%                                                          | 34.0%                                                                                                                                       |

955 <sup>a</sup> Three candidate final product standards are shown on the left side of the table. On the right side of the standards, the  
956 relative risk from two different *Salmonella* level distribution inputs.

957 <sup>b</sup> Proportion of products meeting the described contamination profile was collected from a simulation from A3.

958 <sup>c</sup> Relative Risk of Illness per Serving (%) is calculated as: The mean number of illnesses estimated from products meeting  
959 characterized contamination/The mean number of illnesses estimated from all products x 100. The relative risk is  
960 calculated by running one simulation of 1 million iterations in R. The baseline probability of illness in a serving was scaled  
961 to 2 illnesses in a million servings.

962 <sup>d</sup> Different scaling factors were used for each approach and the dataset to match the baseline probability of illness per  
963 serving to about 1.9 in a million ( $1.9 \times 10^{-6}$  illness/serving) based on calculations from public health data (Refer to  
964 Simulating Salmonella dose in one serving using a scaling factor to adjust for retail to consumer handling practices in  
965 materials and methods section). The scaling factor accounts for all customer and consumer handling from packing the  
966 finished product to consumption. Baseline mean illness was calculated by multiplying this baseline probability of illness  
967 per serving and the total number of servings in a year.

968 <sup>e</sup> A1: All serotypes equal; A1.1: All serotypes equal using triangular distribution for DR parameters; A2: Reduced virulence  
969 for Kentucky using Anatum DR model, A2.1: Reduced virulence for Kentucky using Anatum DR model and WHO/FAO  
970 (2002) using triangular distribution for DR parameters.

971 <sup>f</sup> KPI serotype is a Key Performance Indicator serotype which was defined by USDA-FSIS for poultry as Enteritidis,  
972 Infantis and Typhimurium at the time of this work.

973

Assessing salmonellosis risk in raw chicken parts using QMRA

974 Table S3. Comparing relative risk of illnesses for the implementation of models in R or @RISK for Excel from 2023  
 975 HACCP verification data input level.

| Final Product Standard being evaluated <sup>a</sup> |                    |                                       | Food loss<br>(% products meeting Implication for the contamination on profile described <sup>b</sup> ) | Relative Risk <sup>c</sup> of Illness per Serving Compared to Baseline Illness <sup>d</sup> |                                                         |                                                                                         |                                                  |                                                                |                                                                                                                                             |
|-----------------------------------------------------|--------------------|---------------------------------------|--------------------------------------------------------------------------------------------------------|---------------------------------------------------------------------------------------------|---------------------------------------------------------|-----------------------------------------------------------------------------------------|--------------------------------------------------|----------------------------------------------------------------|---------------------------------------------------------------------------------------------------------------------------------------------|
| Type                                                | Level (CFU/g)      | Serotypes                             |                                                                                                        | A1 <sup>e</sup> – All serotypes equal - R                                                   | A1 <sup>e</sup> – All serotypes equal – @ Risk in Excel | A1.1 <sup>e</sup> – All serotypes equal using triangular distribution - @ Risk in Excel | A2 <sup>e</sup> – Reduced virulence Kentucky – R | A2 <sup>e</sup> – Reduced virulence Kentucky – @ Risk in Excel | A2.1 <sup>e</sup> – Reduced virulence for Kentucky using Anatum Dr model and WHO/FAO (2002) using triangular distribution – @ Risk in Excel |
| Baseline                                            | All (No threshold) | All                                   | 100%                                                                                                   | 100.0%                                                                                      | 100.0%                                                  | 100.0%                                                                                  | 100.0%                                           | 100.0%                                                         | 100.0%                                                                                                                                      |
| Level only                                          | >0.0074            | All                                   | 13.3%                                                                                                  | 99.998%                                                                                     | 99.998%                                                 | 99.998%                                                                                 | 99.998%                                          | 99.998%                                                        | 99.997%                                                                                                                                     |
|                                                     | >1                 | All                                   | 2.3%                                                                                                   | 99.9%                                                                                       | 99.9%                                                   | 99.9%                                                                                   | 99.9%                                            | 99.9%                                                          | 99.9%                                                                                                                                       |
|                                                     | >10                | All                                   | 0.83%                                                                                                  | 99.6%                                                                                       | 99.6%                                                   | 99.5%                                                                                   | 99.6%                                            | 99.5%                                                          | 99.5%                                                                                                                                       |
| Level & high-virulent (KPI) <sup>e</sup> serotypes  | >0.0074            | Enteritidis, Infantis, or Typhimurium | 6.8%                                                                                                   | 53.2%                                                                                       | 51.9%                                                   | 42.5%                                                                                   | 69.5%                                            | 78.4%                                                          | 85.2%                                                                                                                                       |
|                                                     | >1                 | Enteritidis, Infantis, or Typhimurium | 1.2%                                                                                                   | 53.1%                                                                                       | 51.9%                                                   | 42.4%                                                                                   | 69.4%                                            | 78.3%                                                          | 85.1%                                                                                                                                       |
|                                                     | >10                | Enteritidis, Infantis, or Typhimurium | 0.42%                                                                                                  | 53.0%                                                                                       | 51.8%                                                   | 42.2%                                                                                   | 69.2%                                            | 78.0%                                                          | 84.9%                                                                                                                                       |
| Level & exclude low-virulent serotype               | >0.0074            | All except Kentucky                   | 9.4%                                                                                                   | 74.5%                                                                                       | 67.0%                                                   | 80.3%                                                                                   | 98.7%                                            | 99.2%                                                          | 99.4%                                                                                                                                       |
|                                                     | >1                 | All except Kentucky                   | 1.7%                                                                                                   | 74.4%                                                                                       | 66.9%                                                   | 80.3%                                                                                   | 98.6%                                            | 99.1%                                                          | 99.3%                                                                                                                                       |
|                                                     | >10                | All except Kentucky                   | 0.59%                                                                                                  | 74.2%                                                                                       | 66.7%                                                   | 80.0%                                                                                   | 98.3%                                            | 98.8%                                                          | 98.9%                                                                                                                                       |

976 <sup>a</sup> Three candidate final product standards are shown on the left side of the table. On the right side of the standards, the  
 977 relative risk from two different *Salmonella* level distribution inputs

978 <sup>b</sup> Proportion of products meeting the described contamination profile was collected from a simulation from A3.

979 <sup>c</sup> Relative Risk of Illness per Serving (%) is calculated as: The mean number of illnesses estimated from products meeting  
980 characterized contamination/The mean number of illnesses estimated from all products x 100. The relative risk is  
981 calculated by running one simulation of 1 million iterations in R. The baseline probability of illness in a serving was scaled  
982 to 2 illnesses in a million servings.

983 <sup>d</sup> Different scaling factors were used for each approach and the dataset to match the baseline probability of illness per  
984 serving to about 1.9 in a million ( $1.9 \times 10^{-6}$  illness/serving) based on calculations from public health data (Refer to  
985 Simulating Salmonella dose in one serving using a scaling factor to adjust for retail to consumer handling practices in  
986 materials and methods section). The scaling factor accounts for all customer and consumer handling from packing the  
987 finished product to consumption. Baseline mean illness was calculated by multiplying this baseline probability of illness  
988 per serving and the total number of servings in a year.

989 <sup>e</sup> A1: All serotypes equal; A1.1: All serotypes equal using triangular distribution for DR parameters; A2: Reduced virulence  
990 for Kentucky using Anatum DR model, A2.1: Reduced virulence for Kentucky using Anatum DR model and WHO/FAO  
991 (2002) using triangular distribution for DR parameters.

992 <sup>f</sup> KPI serotype is a Key Performance Indicator serotype which was defined by USDA-FSIS for poultry as Enteritidis,  
993 Infantis and Typhimurium at the time of this work



## Assessing salmonellosis risk in raw chicken parts using QMRA

994
